# Supplementary material for: S-Acylation of Proteins of Coronavirus and Influenza Virus: Conservation of Acylation Sites in Animal Viruses and DHHC Acyltransferases in Their Animal Reservoirs
Source: MDPI journal article supplement (doi:10.3390/pathogens10060669), 2021-05-29
Supplement: s1 [file s1]

**Table S1: Amino acid sequences at the C-terminus of HA-subtypes from Flu A, HA from Flu B and HEF From Flu C and Flu D**

|         | subtype  | host      | transmembrane domain |   |   |   |   |   |   |   |   |   | cytoplasmic tail |   |   |   |   |   |   |   |   |   |   |   |
|---------|----------|-----------|----------------------|---|---|---|---|---|---|---|---|---|------------------|---|---|---|---|---|---|---|---|---|---|---|
| Group-1 | H1       | A, H, P   | V                    | S | L | G | A | I | S | F | W | M | C                | S | N | G | S | L | Q | C | R | I | C | I |
|         | H2       | A, H, P   | I                    | M | I | A | G | I | S | F | W | M | C                | S | N | G | S | L | Q | C | R | I | C | I |
|         | H5       | A         | I                    | M | V | A | G | L | S | L | W | M | C                | S | N | G | S | L | Q | C | R | I | C | I |
|         | H6       | A         | G                    | L | I | I | A | M | G | L | W | M | C                | S | N | G | S | M | Q | C | R | I | C | I |
|         | H8       | A         | I                    | L | I | A | G | G | L | I | L | G | M                | Q | N | G | S | C | R | C | M | F | C | I |
|         | H9       | A         | M                    | G | F | A | A | F | L | F | W | A | M                | S | N | G | S | C | R | C | N | I | C | I |
|         | H12      | A         | L                    | M | I | I | G | G | F | I | F | G | C                | Q | N | G | N | V | R | C | T | F | C | I |
|         | H11      | A         | A                    | I | I | M | G | F | I | F | W | A | C                | S | N | G | S | C | R | C | T | I | C | I |
|         | H13 gull | A         | G                    | L | I | L | A | F | I | M | W | A | C                | S | S | G | N | C | R | F | N | V | C | I |
|         | H16 gull | A         | G                    | L | I | L | A | F | I | M | W | A | C                | S | S | G | N | C | R | F | N | V | C | I |
|         | H17 bat  | B         | S                    | L | I | I | A | A | F | L | W | G | C                | Q | K | G | S | I | Q | C | K | I | C | I |
|         | H18 bat  | B         | L                    | I | I | L | A | A | I | E | W | G | C                | F | K | G | N | L | Q | C | R | I | C | I |
| Group-2 | H3       | A, H, P,E | V                    | V | L | L | G | F | I | M | W | A | C                | Q | K | G | N | I | R | C | N | I | C | I |
|         | H4       | A         | A                    | L | L | L | A | F | I | L | W | A | C                | Q | N | G | N | I | R | C | Q | I | C | I |
|         | H7       | A, E      | A                    | I | A | M | G | L | V | F | I | C | I                | K | N | G | N | M | R | C | T | I | C | I |
|         | H10      | A         | A                    | V | I | M | G | L | V | F | F | C | L                | K | N | G | N | M | R | C | T | I | C | I |
|         | H14      | A         | A                    | L | I | L | G | F | V | L | W | A | C                | Q | N | G | N | I | R | C | Q | I | C | I |
|         | H15      | A         | A                    | I | A | M | G | L | I | F | M | C | V                | K | N | G | N | L | R | C | T | I | C | I |
|         | Flu B    | H         | L                    | M | I | A | I | F | I | V | Y | M | V                | S | R | D | N | V | S | C | S | I | C | L |
|         | toad     | Am        | A                    | I | T | I | A | A | G | I | M | F | L                | C | K | N | G | R | C | T | I | C | I |   |
|         | eel      | F         | I                    | V | I | A | G | A | I | M | Y | M | G                | K | S | G | N | I | R | C | N | I | C | L |
|         | Flu C    | H         | L                    | A | A | L | V | I | S | G | I | A | C                | R | T | K |   |   |   |   |   |   |   |   |
|         | Flu D    | C, P      | I                    | A | A | F | V | G | V | I | W | I | C                | C | K | K |   |   |   |   |   |   |   |   |

Acylated cysteine residues are highlighted in yellow. Sequences are the consensus sequences calculated for each HA subtype and for HA of Flu B as described in Siche et al.

H17 and H18 are viruses from bats.

H17: A/little yellow-shouldered bat/Guatemala/060/2010(H17N10). Accession number:

AFC35438. H18: A/flat-faced bat/Peru/033/2010(H18N11); AGX84934:

Influenza C virus (C/Johannesburg/1/1966); UniProtKB - P07975.

Influenza D virus (D/bovine/France/2986/2012; NC\_026952.

Toad: Wuhan asiatic toad influenza virus, unclassified Orthomyxovirus; AVM87632

Eel: Wuhan spiny eel influenza virus, unclassified Orthomyxovirus; AVM87624

Hosts: A: avian, H: human, P: pig, B: bat, E: equine, C: cattle, Am: amphibia, F: fish

**Table S2: Accession numbers of HA sequences used to generate the phylogenetic tree in Fig.1**

| Virus name                                                | Subtype  | No          |
|-----------------------------------------------------------|----------|-------------|
| A/WSN/1933(H1N1)                                          | H1       | U08903.1    |
| A/semi-palmated sandpiper/Brazil/43/1990(H2N1)            | H2       | CY005413.1  |
| A/mallard duck/ALB/26/1976(H3N1)                          | H3       | CY005943.1  |
| A/mallard/ALB/47/1998(H4N1)                               | H4       | CY004925.1  |
| A/turkey/England/50-92/91(H5N1)                           | H5       | EU636692.1  |
| A/gray teal/Australia/1/1979(H6N1)                        | H6       | CY014623.1  |
| A/chicken/Rostock/45/1934(H7N1)                           | H7       | CY077420.1  |
| A/turkey/Ontario/6118/1968(H8N4)                          | H8       | CY014659.1  |
| A/mallard/Alberta/11/1991(H9N2)                           | H9       | CY005990.1  |
| A/mallard/ALB/5/1995(H10N1)                               | H10      | CY005997.1  |
| A/black duck/Ohio/194/1986(H11N1)                         | H11      | CY017765.1  |
| A/mallard/Interior Alaska/9BM1907R1/2009(H12)             | H12      | CY079894.1  |
| A/herring gull/DE/475/1986(H13N2)                         | H13      | CY005914.1  |
| A/blue-winged teal/Guatemala/CIP049H106-62/2011(H14N6)    | H14      | KJ195668.1  |
| A/sooty tern/Western Australia/2190/1983(H15N9)           | H15      | CY006033.1  |
| A/herring gull/DE/712/1988(H16N3)                         | H16      | CY005933.1  |
| A/little yellow-shouldered bat/Guatemala/153/2009(H17N10) | H17      | CY103876.1  |
| A/Artibeus lituratus/Brazil/2301/2012(H18N11)             | H18      | MH682203.1  |
| B/Lee/40                                                  | FluB HA  | DQ792897.1  |
| C/Ann Arbor/1/50                                          | FluC HEF | NC_006310.2 |
| D/bovine/Texas/72/2017                                    | FluD HEF | MT636473.1  |

**Table S3: Frequency of amino acids other than cysteine at position 50 of M2 of the indicated virus strains**

| Virus host<br>HA-subtype | Time period of<br>collection date | Total M2<br>Sequences | Unique M2<br>Sequences | Percent of unique sequences<br>not containing a Cys 50<br>Substituted by |
|--------------------------|-----------------------------------|-----------------------|------------------------|--------------------------------------------------------------------------|
| <b>Avian M2</b>          |                                   |                       |                        |                                                                          |
| H1                       | 1976-2018                         | 945                   | 158                    | <b>1,9%</b> Tyr, Ser                                                     |
| H2                       | 1973-2018                         | 541                   | 109                    | <b>1,9%</b> Tyr                                                          |
| H3                       | 1963-2019                         | 2181                  | 271                    | <b>2,2%</b> Tyr                                                          |
| H4                       | 1956-2019                         | 2012                  | 224                    | <b>1,3%</b> , Tyr, Phe                                                   |
| H5                       | 1995-2020                         | 4208                  | 845                    | <b>11,0%</b> Tyr                                                         |
| <i>H5N1</i>              | 1996-2019                         | 2360                  | 501                    | <b>10%</b> , Tyr                                                         |
| H6                       | 1963-2018                         | 1781                  | 331                    | <b>8,5%</b>                                                              |
| H7                       | 1902-2018                         | 2163                  | 344                    | <b>2,6%</b>                                                              |
| <i>H7N9</i>              | 2013-2017                         | 623                   | 94                     | <b>3,2%</b> , Tyr                                                        |
| H8                       | 1967-2016                         | 178                   | 37                     | <b>11 %</b>                                                              |
| H9                       | 1966-2019                         | 2006                  | 660                    | <b>12%</b>                                                               |
| H10                      | 1949-2019                         | 1281                  | 144                    | <b>0,7%</b>                                                              |
| H11                      | 1956-2019                         | 767                   | 135                    | <b>2,2%</b>                                                              |
| H12                      | 1975-2018                         | 349                   | 62                     | <b>0</b>                                                                 |
| H13                      | 1977-2018                         | 515                   | 78                     | <b>2,5%</b>                                                              |
| H14                      | 1982-2016                         | 40                    | 10                     | <b>0</b>                                                                 |
| H15                      | 1979-2015                         | 10                    | 1                      | <b>0</b>                                                                 |
| H16                      | 1975-2019                         | 258                   | 45                     | <b>0</b>                                                                 |
| <b>Human M2</b>          |                                   |                       |                        |                                                                          |
| H1N1 „Spanish-Flu“       | 1918-1976                         | 84                    | 28                     | <b>0%</b>                                                                |
| H1N1 „Russian Flu“       | 1977-2008                         | 1437                  | 162                    | <b>74%</b> , Ser                                                         |
| H1N1 „Swine Flu“         | 2010-2020                         | 11186                 | 454                    | <b>0,2%</b> , Tyr                                                        |
| H2N2 „Asian Flu“         | 1957-1968                         | 122                   | 23                     | <b>0%</b>                                                                |
| H3N2 „Hongkong“          | 1968-2020                         | 23232                 | 905                    | <b>0,4%</b> , Tyr                                                        |
| H5 „bird Flu“            | 1997-2018                         | 202                   | 62                     | <b>24%</b> , Tyr, Phe                                                    |
| H7 „bird Flu“            | 1996-2018                         | 127                   | 36                     | <b>2,8%</b> , Tyr                                                        |
| <b>Porcine M2</b>        |                                   |                       |                        |                                                                          |
| H1N1                     | 1930-2019                         | 4050                  | 934                    | <b>3,3%</b> , Tyr, Phe, Ser                                              |
| H3N2                     | 1978-2019                         | 3030                  | 620                    | <b>2,4%</b> , Tyr, Phe                                                   |
| H1N2                     | 1980-2019                         | 3174                  | 676                    | <b>2,5%</b> , Tyr, Trp, Phe, Ser                                         |
| <b>Equine M2</b>         |                                   |                       |                        |                                                                          |
| H7N7                     | 1956-1977                         | 15                    | 7                      | <b>0%</b>                                                                |
| H3N8                     | 1963-2017                         | 200                   | 45                     | <b>87%</b> , Phe                                                         |
| <b>Canine M2</b>         |                                   |                       |                        |                                                                          |
| H3N8                     | 2003-2016                         | 61                    | 15                     | <b>87%</b> , Phe, Ser                                                    |
| H3N2                     | 2006-2019                         | 240                   | 36                     | <b>0%</b>                                                                |
| <b>Bat M2</b>            |                                   |                       |                        |                                                                          |
| H17N10                   | 2009-2010                         | 2                     | 2                      | <b>100%</b> , only Tyr                                                   |
| H18N11                   | 2010-2011                         | 2                     | 2                      | <b>100%</b> , only Tyr                                                   |

The NCBI database was searched for full-length M2 sequences (97 amino acids) present in a virus from a specific host, and having a specific HA (and partially NA) subtype as indicated. M2 sequences were aligned and the number of cysteines at position 50 calculated. The “time period of collection date” is the first and last year were the virus was isolated or sequenced.

Table S4: Amino acid sequences at the C-terminus of the spike protein of Coronaviruses

| Genus        | Subgenus      | Species   | Host           | TMR                     | Cytoplasmic tail                             |
|--------------|---------------|-----------|----------------|-------------------------|----------------------------------------------|
| Alpha        | Pedacovirus   | 512/2005  | Scoto. kuhlii  | WYVWLAIVIALILVVSLLVF    | CCISTGCCGCCGCGSCFSGCCRGTKLQHYEPIEKVHVQ       |
|              | Tegacovirus   | Insavc-1  | Canis lupus    | WYVWLLIGLVVIFCIPILLF    | CCCSTGCCGCIGCLGSCCHSICSRQGFESEYEPIEKVHVH     |
|              |               | FIPV      | Felidae        | WYVWLLIGLVVFCIPLLLF     | CCFSTGCCGCIGCLGSCCHSICSRQGFESEYEPIEKVHVH     |
|              | Duvinacovirus | hCoV 229E | Homo sapiens   | WWVWLCISVVLIFVVSMLLL    | CCCSTGCCGFFSCFASSIRGCCSTKLPYYDVEKIHQ         |
|              | Setracovirus  | hCoV NL63 | Homo sapiens   | WWVWLIISVVFVLLSLLVF     | CCLSTGCCGCCNCLTSSMRGCCDCCGSTKLPYYEVEKVVHVQ   |
|              | Rhinacovirus  | SADS      | Sus scrofa     | WAWWQWLLIFIALTLLAGLMLW  | CCLATGCCGMCGLAATCASCCDCRGTKLQSYEIEKVVHVQ     |
| Beta         | Sarbecovirus  | SARS2     | Homo sapiens   | WYIWLGFIAGLIAIVMTIML    | CCMTSCCSCCLKGCCSCGSCCKFDEDDSEPVLKGVKLHYT     |
|              |               | RaTG13    | R. affinis     | WYIWLGFIAGLIAIMVTIML    | CCMTSCCSCCLKGCCSCGSCCKFDEDDSEPVLKGVKLHYT     |
|              |               | Pangolin  | M. javanica    | WYIWLGFIAGLIAIMVTIML    | CCMTSCCSCCLKGCCSCGSCCKFDEDDSEPVLKGVKLHYT     |
|              |               | SARS      | Homo sapiens   | WYVWLGFIAGLIAIVMTILL    | CCMTSCCSCCLKGACSCGSCCKFDEDDSEPVLKGVKLHYT     |
|              |               | HKU3      | R. sinicus     | WYVWLGFIAGLIAIVMTILL    | CCMTSCCSCCLKGACSCGSCCKFDEDDSEPVLKGVKLHYT     |
|              |               | Rp3/2004  | R. spec        | WYVWLGFIAGLIAIVMTILL    | CCMTSCCSCCLKGACSCGSCCKFDEDDSEPVLKGVKLHYT     |
|              |               | 279/2005  | R. macrotis    | WYVWLGFIAGLIAIVMTILL    | CCMTSCCSCCLKGACSCGSCCKFDEDDSEPVLKGVKLHYT     |
|              |               | RsSHC014  | R. sinicus     | WYVWLGFIAGLIAIVMTILL    | CCMTSCCSCCLKGACSCGSCCKFDEDDSEPVLKGVKLHYT     |
|              |               | Rs3367    | R. sinicus     | WYVWLGFIAGLIAIVMTILL    | CCMTSCCSCCLKGACSCGSCCKFDEDDSEPVLKGVKLHYT     |
|              | Merbecovirus  | MERS      | Homo sapiens   | WYIWLGFIAGLVALALCVFFI   | LCCTGCGTNCMGKLKCNRCCDRYEEYDLEPHKVHVH         |
|              |               | HKU4      | Tylo. pachypus | WYVWLGFIAGLVALLCVFFL    | LCCTGCGTSCLGKMKCKNCCDSYEEYDVEKIHVH           |
|              |               | Neo       | Neo. capensis  | WYIWLGFIAGLLALALCVFFI   | LCCTGCGTSCLGKLKCNRCCDKYEEYDLEPHKIHVH         |
|              |               | HKU5      | Pip. abramus   | WYIWLGFIAGLVALALCVFFI   | LCCTGCGTSCLGKLKCNRCCDSYDEYEVEKIHVH           |
|              |               | 133/2005  | Tylo.pachypus  | WYIWLGFIAGLVALLCVFFL    | LCCTGCGTSCLGKMKCKNCCDSYEEYDVEKIHVH           |
|              | Embecovirus   | hCoV HKU1 | Homo sapiens   | WYVWLLISFSFIIFLVLLFFI   | CCCTGCGSACFSKCHNCCDEYGGHHDFVIKTSRDD          |
|              |               | hCoV OC43 | Homo sapiens   | WYVWLLICLAGVAMLVLLFFI   | CCCTGCGTSCFKKCGGCCDDYTGYQELVIKTSRDD          |
|              |               | MHV       | Mus musculus   | WYVWLLIGLAGVAVCVLLFFI   | CCCTGCGSCCFKKCGNCCDEYGGHQSIVIHNISSHED        |
|              |               | Quebec    | Bos taurus     | WYVWLLIGFAGVAMLVLLFFI   | CCCTGCGTSCFKICGGCCDDYTGHQELVIKTSRDD          |
|              | Nobecovirus   | HKU9      | R.leschenaulti | WYVWLAMIAGIVGLVLAVIML   | MCMTNCCSCFKGMCDCRRCCGSYDSYDDVYPAVRVNKKRTV    |
| Gamma        | Igacovirus    | IBV       | Gallus gallus  | VWLAIATIIIFILIGWVFF     | MTGCCGCCGCFGIMPLMSKCGKKSSYYTTFDNDVTEQ...     |
| Delta        | Andecovirus   | HKU20     | wigeon         | WWVWLLIFLAICTFIIIVTIFL  | CTGCCGCCGCFGCGGCCGLFSRVKHHEFSLPVEEQDGS...    |
|              | Herdecovirus  | HKU19     | Night heron    | WYVWLAIALAFTGFVTILITIFL | CTGCCGCCGCFGCGGCCFGLFSKKIDPMRQYMNRYETPTSK... |
|              | Buldecovirus  | PDCoV     | Sus scrofa     | WYIWLAIALALIAFVTILITIFL | CTGCCGCCGCFGCGGCCFGLFSKKKRYTDDQPTPSFKFEW     |
| Unclassified |               | GCWSCoV   | Tro. sinicus   | WWVWLIISIVWTIFFLLILM    | CCCFGTGCCGICGCIARSARKRLDVEGGHFKYD            |

**Cysteine residues are highlighted in yellow; ...: indicate additional amino acids.**

**Accession numbers:** SARS-CoV2 (sp|P0DTC2), SARS-CoV (sp|P59594), MERS-CoV (sp|K9N5Q8), Bat coronaviruses; HKU3 (SARS-like coronavirus HKU3(sp|Q3LZX1), HKU4 (Bat coronavirus HKU4 (sp|A3EX94), HKU5 (Bat coronavirus HKU5(sp|A3EXD0), HKU9 (Bat coronavirus HKU9 (sp|A3EXG6), Rp3/2004 (Bat coronavirus Rp3/2004(sp|Q3I5J5), 133/2005 (Bat coronavirus 133/2005(sp|Q0Q4F2), 512/2005 (Bat coronavirus 512/2005(sp|Q0Q466), 279/2005 (Bat coronavirus 279/2005 (sp|Q0Q475), RaTG13 (Bat coronavirus RaTG13) (tr|A0A6B9WHD3), RsSHC014 (Bat SARS-like coronavirus RsSHC014 (tr|U5WLK5), Rs3367 (Bat SARS-like coronavirus Rs3367 (tr|U5WHZ7), NeoCoV (Coronavirus Neoromicia/PML-PHE1/RSA/2011(AGY29650.2), Human coronaviruses; HKU1 (human coronaviruses HKU1-isolate N1) (sp|Q5MQD0), 229E (Human coronavirus 229E) (sp|P15423), NL63 (Human coronavirus NL63) (sp|Q6Q1S2) and OC43 (Human coronavirus OC43) (sp|P36334), Quebec (Bovine coronavirus Quebec strain) (sp|P25193), Insavc-1 (canine coronavirus Insavc-1 strain) (sp|P36300), IBV (Avian infectious bronchitis virus)(sp|P11223), FIPV (Feline infectious peritonitis virus) (sp|P10033), MHV (Murine hepatitis virus) (sp|P11224), Pangolin coronavirus (tr|A0A6G6A2R8), HKU20 (Wigeon coronavirus HKU20 (tr|H9BR25), HKU19 (Night heron coronavirus HKU19) (tr|H9BR17), SADS (Swine acute diarrhea syndrome coronavirus)(tr|A0A2P1G7F5), PDCoV (Porcine deltacoronavirus)(tr|A0A140ESF1), GCWSCoV (Guangdong Chinese water skink coronavirus) (AVM87574).

**Table S5: Amino acid sequences at the C-terminus of the spike protein of newly discovered Coronaviruses with zoonotic potential**

| Genus        | Subgenus      | Species     | Host                 | TMR                    | Cytoplasmic tail                        |
|--------------|---------------|-------------|----------------------|------------------------|-----------------------------------------|
| Alpha        | Minunacovirus | Bat CoV 1   | Miniopterus sp.      | WYVWLAIAVTLIILVGPMWLW  | CCLATGCCGCSCLVNSCSDCGGRRLQRYEIEKVHVQ    |
|              | Pedacovirus   | 512/2005    | Scotophilus kuhlii   | WYVWLAIVIALILVVSLLVF   | CCISTGCCGCGCGSCFSGCCRGTKLQHYEPIEKVHVQ   |
|              | Unclassified  | BtKY22/2006 | Chaerephon sp.       | WYVWLLIVVALTILAGIMLY   | CCLATGCCGCSCLMTNTLDFRGRNLQRYEVEKVHVQ    |
| Beta         | Sarbecovirus  | SARS-2      | Homo sapiens         | WYIWLGFIAGLIAIVMTIML   | CCMTSCCSCLKGCCSCGSCCKFDEDDSEPVLKGVKLHYT |
|              |               | SARS        | Homo sapiens         | WYVWLGFIAGLIAIVMTILL   | CCMTSCCSCLKGACSCGSCCKFDEDDSEPVLKGVKLHYT |
|              | Embecovirus   | Longquan Aa | Apodemus agrarius    | WYVWLLIGLAGVAVLVLLF... | CCCTGCGASCFFKCGSCDDYGGHQDIVVKTSRDD      |
|              | Merbecovirus  | MERS        | Homo sapiens         | WYIWLGFIAGLVALALCVFFI  | LCCGTGCGTNCMGKLKCNRCDDRYEEDYLEPHKVHVH   |
|              |               | SC2013      | Vespertilio superans | WYIWLGFIAGLVALALCVF... | LCCGTGCGTNCMGKLKCNRCDDKYDDYDVEPHKIHVH   |
|              | Unclassified  | BtKY24/2006 | Eidolon helvum       | WYAWLGMIAGLVGLAMAVFMLC | CCMTNCCSGLKGI CSCKQCQYDDYADVPAVRVSGKRTV |
| Unclassified |               | Rodent CoV  | Myodes rufocanus     | WYVWLLIGLAGVAVLVLLF... | CCCTGCGSSCFKKCGGDDYGGHQELVIKTSRDD       |

Cysteine residues are highlighted in yellow: ....dots indicate incomplete sequences

**Spike protein sequences** of Coronaviruses; BtKY22/2006 (Chaerephon bat coronavirus/Kenya/KY22/2006) (tr|F1DB20), Longquan Aa (Longquan Aa mouse coronavirus) (tr|A0A096XNE4), BtKY24/2006 (Eidolon bat coronavirus/Kenya/KY24/2006) (tr|F1DAZ1), Rodent CoV (Rodent coronavirus) (tr|A0A2H4MXV6), Bat CoV 1 (Miniopterus bat coronavirus 1) (tr|B1PHJ5), SC2013 (BtVs-BetaCoV/SC2013) (tr|A0A023Y9K3), 512/2005 (Bat coronavirus 512/2005) (sp|Q0Q466)

Animal hosts and their taxonomy: *Chaerephon* sp. Is belonging to the bat *Molossidae*, *Miniopterus* sp. to the family *Miniopteridae*, *Eidolon helvum* to the family *Pteropodidae* and the bats *Scotophilus kuhlii* and *Vespertilio sinensis* belong to the family *Vespertilionidae*. The rodents *Apodemus agrarius* belongs to the family *Muridae* and *Myodes rufocanus* to the family *Cricetidae*.

Table S6: Amino acid sequences at the C-terminus of the envelope protein of Coronaviruses

| Genus | Subgenus      | Species   | Host            | TMR                      | Cytoplasmic tail                               |
|-------|---------------|-----------|-----------------|--------------------------|------------------------------------------------|
| Alpha | Pedacovirus   | 512/2005  | Scoto. kuhlii   | ILWLFLVLFVFLVISITFVQLI   | NLCFTCHRLCNNVVYKPVGKVGKVSYSYMRIQPLTSDIIQV      |
|       | Tegacovirus   | Insavc-1  | Canis lupus     | IFWFLIIIIILILFSIALLNII   | KLCMVCCNLGRTVIIIVPARHAYDAYKNFMQIRAYNPDEALLV    |
|       |               | FIPV      | Felidae         | FFWLLLLIIIIILILFSIALLNVI | KLCMVCCNLGKTIIVLIPARHAYDAYKTFMQTKAYNPDEAFLV    |
|       | Duvinacovirus | hCov 229E | Homo sapiens    | LLWCVLIVILLVCITIIKLI     | KLCFTCHMFCNRTVYGPIKNVYHIYQSYMHDFFPKRVIDF       |
|       | Setracovirus  | hCoV NL63 | Homo sapiens    | ILWLLVMIIFFVLAMTFIKLI    | QLCFTCHYFFSRTLYQPVYKIFLAYQDYMQIAPVPAEVLNV      |
|       | Rhinacovirus  | SADS      | Sus scrofa      | ...VLWLLVLILVLLVAITVIKLI | QLCFSCHRLMSNTIYIPVYNAYLVYKSYMEVEPCPIINV        |
| Beta  | Sarbecovirus  | SARS2     | Homo sapiens    | VNSVLLFLAFVVFLLVTLAIL    | TALRLCAYCCNIVNVSLVKPSFYVYSRVKLNLSRVPDLLV       |
|       |               | RaTG13    | R. affinis      | ...VLLFLAFVVFLLVTLAILTAL | RLCAYCCNIVNVSLVKPSFYVYSRVKLNLSRVPDLLV          |
|       |               | Pangolin  | M. javanica     | ...VLLFLAFVVFLLVTLAILTAL | RLCAYCCNIVNVSLVKPSFYVYSRVKLNLSRVPDLLV          |
|       |               | SARS      | Homo sapiens    | VLLFLAFVVFLLVTLAILTAL    | RLCAYCCNIVNVSLVKPTVYVYSRVKLNLSSEGVPDLLV        |
|       |               | HKU3      | R. sinicus      | VLLFLAFVVFLLVTLAILTAL    | RLCAYCCNIVNVSLVKPTVYVYSRVKLNLSSEGVPDLLV        |
|       |               | Rp3/2004  | R. spec         | VLLFLAFVVFLLVTLAILTAL    | RLCAYCCNIVNVSLVKPTVYVYSRVKLNLSSEGVPDLLV        |
|       |               | 279/2005  | R. macrotis     | VLLFFAFVVFLLVTLAILTAL    | RLCAYCCNIVNVSLVKPTVYVYSRVKLNLSSEGVPDLLV        |
|       |               | RsSHC014  | R. sinicus      | ...VLLFLAFVVFLLVTLAILTAL | RLCAYCCNIVNVSLVKPTVYVYSRVKLNLSSEGVPDLLV        |
|       |               | Rs3367    | R. sinicus      | ...VLLFLAFVVFLLVTLAILTAL | RLCAYCCNIVNVSLVKPTVYVYSRVKLNLSSEGVPDLLV        |
|       |               | MERS      | Homo sapiens    | FIFTVVCAITLLVCMAFLTAT    | RLCVQCMTGFNTLLVQPALYLYNTGRSVYVKFQDSKPPLPP      |
|       |               | HKU4      | Tylo. pachypus  | FILTVVCAITLVVCLAILTAI    | RLCVQCASGVNTLLFVPAFYIYNTGRNAYFKFQENRPPFP       |
|       |               | Neo       | Neo. capensis   | FIFTVVCAITLLVCMAFLTAT    | RLCVQCITGVNTLLVQPAVYMYNTGRSVYVKFQESKPPLPP...   |
|       |               | HKU5      | Pip. abramus    | FILSVCAVTLVCLAILTAI      | RLCVQCVSGCHTLVFLPAVHIYNTGRAAYVKFQESHPPYPP      |
|       |               | 133/2005  | Tylo. pachypus  | FILTVVCAITLLVCLAVLTAI    | RLCVQCASGVNTLLFVPAFYIYNTGRNAYFKFQENRPPFP       |
|       | Embecovirus   | hCoV HKU1 | Homo sapiens    | LVLVLFCLISLIFVVAFLATI    | KLCMQLCGFCNFFIISPSAYVYKRGMQLYKSYSEQVIPPTSD     |
|       |               | hCoV OC43 | Homo sapiens    | IFIVAICLLVTIVVVAFLATF    | KLCIQLCGMCNTLVLSPSIYVFNRGRQFYEFYNDVKPPVLD      |
|       |               | MHV       | Mus musculus    | IFIFAVCLMVTIIVVAFLASI    | KLCIQLCGLCNTLVLSPSIYLYDRSKQLYKYYNEEMRLPLLE     |
|       |               | Ontario   | Bos taurus      | IFIVAICLLVIIIVVVAFLATF   | KLCIQLCGMCNTLVLSPSIYVFNRGRQFYEFYNDVKPPVLD      |
|       | Nobecovirus   | HKU9      | R. leschenaulti | LVLIIICLLVVIIVGCALLLIL   | QFVFGVCGFVFKFVCKPTILVYNKFRNESLLNEREELL         |
| Gamma | Igacovirus    | IBV       | Gallus gallus   | NGSFLTALYIIIVGFLALYLLG   | RALQAFVQAADA CCLFWYTWVVIPGAKGTAFVYKYTYGRK...   |
| Delta | Andecovirus   | HKU20     | Wigeon          | ...PGSVVIAFLIVACCILLLLFI | KTCLAIFDCCSRSCTCVLDTVKPVYSFAYNLVPRFTPPYNP...   |
|       | Herdecovirus  | HKU19     | Night heron     | ...PAIYILVAVILLGCIVFLLLI | KTCLACCDFFTRTYT CILHTVKPIYVYLKPAPVVSKEDEYIK... |
|       | Buldecovirus  | PDCoV     | Sus scrofa      | GQYIIAILVVTICIGVALLFI    | NTCLACVKLFYKCYLGAAYLVRPIIVYYSKPNPVPDEFVK...    |

**Cysteine residues are highlighted in yellow; ...: indicate additional amino acids**

**Accession numbers:** SARS-CoV2 (sp|P0DTC4), SARS-CoV (sp|P59637), MERS-CoV (sp|K9N5R3), Bat coronaviruses; HKU3 (SARS-like coronavirus HKU3)(sp|Q3LZW9), HKU4 (Bat coronavirus HKU4) (sp|A3EX99), HKU5 (Bat coronavirus HKU5) (sp|A3EXD5), HKU9 (Bat coronavirus HKU9) (sp|A3EXG8), Rp3/2004 (Bat coronavirus Rp3/2004) (sp|Q3I5J3), 133/2005 (Bat coronavirus 133/2005) (sp|Q0Q4E8), 512/2005 (Bat coronavirus 512/2005) (sp|Q0Q464), 279/2005 (Bat coronavirus 279/2005) (sp|Q0Q473), RaTG13 (Bat coronavirus RaTG13) (tr|A0A6B9WFI6), RsSHC014 (Bat SARS-like coronavirus RsSHC014) (tr|U5WI28), Rs3367 (Bat SARS-like coronavirus Rs3367) (tr|U5WLL8), NeoCoV (Coronavirus Neoromicia/PML-PHE1/RSA/2011) (AIG13101.1), Human coronaviruses; HKU1 (human coronaviruses HKU1-isolate N1) (sp|Q5MQC8), 229E (Human coronavirus 229E) (sp|P19741), NL63 (Human coronavirus NL63) (sp|Q6Q1S0) and OC43 (Human coronavirus OC43) (sp|Q04854), Ontario (Bovine coronavirus Ontario strain) (sp|P0C2Q6), Insavc-1 (canine coronavirus Insavc-1 strain) (sp|P36696), IBV (Avian infectious bronchitis virus)(sp|Q89894), FIPV (Feline infectious peritonitis virus) (sp|Q52PA5), MHV (Murine hepatitis virus) (sp|P0C2R0), Pangolin coronavirus (tr|A0A6G6A2K2), HKU20 (Wigeon coronavirus HKU20) (tr|H9BR26), and HKU19 (Night heron coronavirus HKU19) (tr|H9BR18), SADS (Swine acute diarrhea syndrome coronavirus)( tr|A0A2P1G6N3), PDCoV (Porcine deltacoronavirus)( tr|A0A0U2IVX8).



**Table S7: Amino acid sequences at the C-terminus of the envelope protein of newly discovered Coronaviruses with zoonotic potential**

| Genus        | Subgenus      | Species     | Host                 | TMR                        | Cytoplasmic tail                          |
|--------------|---------------|-------------|----------------------|----------------------------|-------------------------------------------|
| Alpha        | Minunacovirus | Bat CoV 1   | Miniopterus sp.      | ILWLLFCVSVIIICCALIQLVQL... | QLCFICHRLCSNTVYKPVYKAYKIYQDYMQIEPLPVLNV   |
|              | Pedacovirus   | 512/2005    | Scotophilus kuhlii   | ILWLFLVFFVLVISITFVQLI      | NLCFTCHRLCNNVVKPVGKVYGVYKSYMRIQPLTSDIIQV  |
|              | Unclassified  | BtKY22/2006 | Chaerephon sp.       | LNLLLWLMICCAVIVICNAVI      | QLIFTCHRFCSSTVYTPVYAVYRIYQNYMRIDPLPVIDV   |
| Beta         | Sarbecovirus  | SARS2       | Homo sapiens         | VLLFLAFVVFLLVTLAILTAL      | RLCAYCCNIVNVSLVKPSFYVYSRVKNLNSSRPDLLV     |
|              |               | SARS        | Homo sapiens         | VLLFLAFVVFLLVTLAILTAL      | RLCAYCCNIVNVSLVKPTVYVYSRVKNLNSSEGVPDLLV   |
|              | Embecovirus   | Longquan Aa | Apodemus agrarius    | YVGQIILIVAICLLIIVIVVAA...  | KLCIQLCGMCNTLVVSPSIYVYNRGRQFYKFYSDAKPP... |
|              | Merbecovirus  | MERS        | Homo sapiens         | FIFTVVCATLLVCMFLTAT        | RLCVQCMTGFTLLVQPALYLYNTGRSVYVKFQDSKPPLPP  |
|              |               | SC2013      | Vespertilio superans | FIVNFFIFTVACAIILLVCMA...   | RLCVQCAIGLNALLVQPAIYVYNTGRSVYVKFQESKPP... |
|              | Unclassified  | BtKY24/2006 | Eidolon helvum       | LITNILLLVIASLLFVIVGCAL...  | GACGCLANIVCKPTIILYRKFKYESLLNEQEDII        |
| Unclassified |               | Rodent CoV  | Myodes rufocanus     | YVGQIIFIFAICLFVIVVVVAFLA   | TFKLCVQLCGICNTLVLSPSIYVYNRGRQFYEFYQD...   |

Cysteine residues are highlighted in yellow: ... dots indicate incomplete sequences

**Envelope protein sequences** of Coronaviruses; BtKY22/2006 (Chaerephon bat coronavirus/Kenya/KY22/2006) (tr|F1DB22), Longquan Aa (Longquan Aa mouse coronavirus) (tr|A0A096XNF4), BtKY24/2006 (Eidolon bat coronavirus/Kenya/KY24/2006) (tr|F1DAZ3), Rodent CoV (Rodent coronavirus) (tr|A0A2H4N004), Bat CoV 1 (Miniopterus bat coronavirus 1) (tr|B1PHJ7), SC2013 (BtVs-BetaCoV/SC2013) (tr|A0A023Y9K8), 512/2005 (Bat coronavirus 512/2005) (sp|Q0Q464)

Animal hosts and their taxonomy: *Chaerephon* sp. is belonging to the bat *Molossidae*, *Miniopterus* sp. to the family *Miniopteridae*, *Eidolon helvum* to the family *Pteropodidae* and the bats *Scotophilus kuhlii* and *Vespertilio sinensis* belong to the family *Vespertilionidae*. The rodents *Apodemus agrarius* belongs to the family *Muridae* and *Myodes rufocanus* to the family *Cricetidae*.

**Table S8: Amino acid differences between human DHHC2 and DHHC2 of animal hosts of Flu A**

|                    |             |                     |             |                     |             |                          |
|--------------------|-------------|---------------------|-------------|---------------------|-------------|--------------------------|
|                    | ..... ..... | ..... .....         | ..... ..... | ..... .....         | ..... ..... | ..... .....              |
|                    | 5           | 15                  | 25          | 35                  | 45          | 55                       |
| Homo sapiens       | -----       | -----MA             | PSGPGSS---  | ARRRCRRVLY          | WIPVVFITLL  | LGWYYAYAI                |
| Sus scrofa         | -----       | -----MA             | PSGPGS----  | VRRCRRVLY           | WIPVVFISLL  | LGWSYYAYAI               |
| Gallus gallus      | MRCGKMAAAA  | P-----SAP           | AAGAAGGWGG  | VRRCQRLLY           | WVPVLFISSI  | LWSYYAYVT                |
| Calidris pugnans   | MRCEKMAAPP  | PE--PPLPLP          | PAGSAGTCMG  | LRRRCQRLLY          | WVPVLFISSI  | LWSYYAYVT                |
| Anas platyrhynchos | MRCGKMAAAP  | PPVAAAGAAA          | AAGAASGWGG  | VRRCQRLLY           | WVPVLFISSI  | LWSYYAYVT                |
|                    |             |                     |             |                     | <b>TMR1</b> |                          |
|                    | ..... ..... | ..... .....         | ..... ..... | ..... .....         | ..... ..... | ..... .....              |
|                    | 65          | 75                  | 85          | 95                  | 105         | 115                      |
| Homo sapiens       | QLCIVSMEN   | GEQVVCLMAY          | HLLFAMFVWS  | YWKTIFTLPM          | NPSKEFHLSY  | AEKDLLEREP               |
| Sus scrofa         | QLCIVSMEN   | GEQVVCLLAY          | HLLFAMFVWS  | YWKTIFTLPM          | NPSKEFHLSY  | AEKELLEREP               |
| Gallus gallus      | QLCLLTMTNI  | GEKVVCLVAY          | HIFFMLFVWS  | YWKTIFTLPM          | NPSKEFHLSY  | SDKESLEREP               |
| Calidris pugnans   | QLCLLTMTNI  | GEKVVCLVAY          | HIFFMLFVWS  | YWKTIFTLPM          | NPSKEFHLSY  | SDKESLEREP               |
| Anas platyrhynchos | QLCLLTMTNI  | GEKVVCLVAY          | HIFFMLFVWS  | YWKTIFTLPM          | NPSKEFHLSY  | SDKESLEREP               |
|                    |             |                     | <b>TMR2</b> |                     |             |                          |
|                    | ..... ..... | ..... .....         | ..... ..... | ..... .....         | ..... ..... | ..... .....              |
|                    | 125         | 135                 | 145         | 155                 | 165         | 175                      |
| Homo sapiens       | RGEAHQEVLR  | RAAKDLPIYT          | RTMSGAIRYC  | DRCLIKPDR           | CHHCSVCDKC  | ILKMDHHCPCW              |
| Sus scrofa         | RGEAHQEVLR  | RAAKDLPIYT          | RTMSGAIRYC  | DRCLIKPDR           | CHHCSVCDKC  | ILKMDHHCPCW              |
| Gallus gallus      | RGESQQEVLR  | RAAKDLPIYT          | RTMSGAIRYC  | DRCHLVKPDR          | CHHCSVCDKC  | ILKMDHHCPCW              |
| Calidris pugnans   | RGESQQEVLR  | RAAKDLPIYT          | RTMSGAIRYC  | DRCHLVKPDR          | CHHCSICDKC  | ILKMDHHCPCW              |
| Anas platyrhynchos | RGESQQEVLR  | RAAKDLPIYT          | RTMSGAIRYC  | DRCHLVKPDR          | CHHCSVCDKC  | ILKMDHHCPCW              |
|                    |             |                     |             | <b>Zinc-binding</b> |             | <b>DHHC</b>              |
|                    | ..... ..... | ..... .....         | ..... ..... | ..... .....         | ..... ..... | ..... .....              |
|                    | 185         | 195                 | 205         | 215                 | 225         | 235                      |
| Homo sapiens       | VNNCVGFSNY  | KFFLLFLAYS          | LLYCLFIAAT  | DLQYFIKFWT          | NGLPDTQAKF  | HIMFLFFAAA               |
| Sus scrofa         | VNNCVGFSNY  | KFFLLFLAYS          | LLYCLFIAAT  | DLQYFIKFWT          | NGLPDTQAKF  | HIMFLFFAAA               |
| Gallus gallus      | VNNCVGFSNY  | KFFLLFLAYS          | LLYCLFIAAT  | DLQYFIKFWT          | NGLPDTQAKF  | HIMFLFFAAA               |
| Calidris pugnans   | VNNCVGFSNY  | KFFLLFLAYS          | LLYCLFIAAT  | DLQYFIKFWT          | NGLPDTQAKF  | HIMFLFFAAA               |
| Anas platyrhynchos | VNNCVGFSNY  | KFFLLFLAYS          | LLYCLFIAAT  | DLQYFIKFWT          | NGLPDTQAKF  | HIMFLFFAAA               |
|                    |             | <b>TMR3</b>         |             |                     |             | <b>TMR4</b>              |
|                    | ..... ..... | ..... .....         | ..... ..... | ..... .....         | ..... ..... | ..... .....              |
|                    | 245         | 255                 | 265         | 275                 | 285         | 295                      |
| Homo sapiens       | MFSVSLSSLF  | GYHCWLVSKN          | KSTLEAFRSP  | VFRHGTDKNG          | FSLGFSKNMR  | QVFGDEKKYW               |
| Sus scrofa         | MFSVSLSSLF  | GYHCWLVSKN          | KSTLEAFRSP  | VFRHGTDKNG          | FSLGFSKNMR  | QVFGDEKKYW               |
| Gallus gallus      | MFSVSLSSLF  | GYHCWLVSKN          | KSTLEVFRAP  | IFRHR               | TDKNG       | FSLGFSKNLR               |
| Calidris pugnans   | MFSVSLSSLF  | GYHCWLVSKN          | KSTLEVFRAP  | IFRHR               | TDKNG       | FSLGFSKNLR               |
| Anas platyrhynchos | MFSVSLSSLF  | GYHCWLVSKN          | KSTLEVFRAP  | IFRHR               | TDKNG       | FSLGFSKNLR               |
|                    |             |                     | <b>TTXE</b> |                     |             | <b>amphiphilic helix</b> |
|                    | ..... ..... | ..... .....         | ..... ..... | ..... .....         | ..... ..... | ..... .....              |
|                    | 305         | 315                 | 325         | 335                 | 345         | 355                      |
| Homo sapiens       | LLPIFSSSLGD | GCSFPTCLVN          | QDPEQASTPA  | GLNSTAKNLE          | NHQFFAKPLR  | ESQSHLLTDS               |
| Sus scrofa         | LLPIFSSSLGD | GCSFPTCLVN          | QDPEQASTPA  | GLNSTSKNPE          | NHQFFAKPLR  | ESQSHLLTDS               |
| Gallus gallus      | LLPVFSSSLGD | GCSFPTCLVN          | QDPEQASTPG  | GLNSTCKN-E          | NHLPFAKPLR  | DSQSHLLTDT               |
| Calidris pugnans   | LLPVFSSSLGD | GCSFPTCLVN          | QDPEQASTPS  | ALNSTSKN-E          | NHLPFAKPLR  | DSQSHLLTDT               |
| Anas platyrhynchos | LLPVFSSSLGD | GCSFPTCLVN          | QDPEQASTPG  | GLNSTSKN-E          | SLLFPFAKPLR | DSQSHLLTDT               |
|                    |             | <b>End of model</b> |             | <b>unstructured</b> |             |                          |
|                    | ..... ..... | ..... .....         | ..... ..... |                     |             |                          |
|                    | 365         | 375                 | 385         |                     |             |                          |
| Homo sapiens       | QSWTESSINP  | GKCKAGMSNP          | ALTMENET    |                     |             |                          |
| Sus scrofa         | QSWTESSTNP  | GKCKSGMSNP          | ALTMENET    |                     |             |                          |
| Gallus gallus      | HSWSDIGAKA  | EKGKVGMSNP          | ALTMENET    |                     |             |                          |
| Calidris pugnans   | PSWSETSGKA  | EKGKVGMSNP          | ALTMENET    |                     |             |                          |
| Anas platyrhynchos | QSWSDISAKA  | EKGKIGMSNP          | ALTMENET    |                     |             |                          |

Amino acid alignment of DHHC2 of humans (*homo sapiens*), pigs (*sus scrofa*) and three avian species, chicken (*gallus gallus*), sandpiper (*Calidris pugnax*) and mallard duck (*Anas platyrhynchos*). The transmembrane regions are highlighted in grey, individual residues that contact the acyl chain in the cavity are highlighted in green and the two (S and T) that seal the cavity are highlighted in pink. The amphiphilic helix following TMR4 is also highlighted in grey. Cys and His residues that coordinate zinc ions, the DHHC motif and the TTEX motif (which is STLE in DHHC2) are highlighted in light blue. LVN is the end of the modeled structure and underlined is the part of the C-terminal region predicted to be unstructured.

Amino acid differences to human DHHC2 are highlighted in yellow in the sequence of the respective species and the non-conservative exchanges labeled in the 3D-structure of DHHC2 are in red.

Table S9: Amino acid differences between human DHHC15 and DHHC15 of animal hosts of Flu A

|            | 5             | 15                  | 25                          | 35          | 45          | 55           |
|------------|---------------|---------------------|-----------------------------|-------------|-------------|--------------|
| Homo sapie | MRRGWKMALS    | GGLRCCRRVL          | SWVPVLVIVL                  | VVLWSYYAYV  | FELCLVTVLS  | PAEKVIYILIL  |
| Sus scrofa | MRRGWKMALS    | GGLRCCRRIL          | SWVPVLVIVL                  | VVLWSYYAYV  | FELCLVTVLS  | PAEKVIYILIF  |
| Gallus gal | -----MALS     | RGLRCCQRAF          | AWVPVLIITL                  | VVLWSYYAYV  | CELCLMTLSN  | PAEKVAYLII   |
| Calidris p | -----MALS     | RGLRCCQRAF          | AWLPVLIITL                  | VVLWSYYAYV  | CELCLVTLSN  | PVEKVAYLII   |
| Anas platy | -----MALS     | RGLRCCQRAF          | AWLPVLIIAL                  | VVLWSYYAYV  | CELCLVTLSN  | PVEKVAYLII   |
|            |               |                     | <b>TMR1</b>                 |             |             | <b>TMR2</b>  |
|            | 65            | 75                  | 85                          | 95          | 105         | 115          |
| Homo sapie | YHAIFVFFTW    | TYWKSIFTLP          | QQPNQKFHLS                  | YTDKERYENE  | ERPEVQKQML  | VDMAKKLPVY   |
| Sus scrofa | YHAIFVFFTW    | TYWKSIFTLP          | QQPNHKFHLS                  | YTDKERYENE  | ERPEVQKQML  | VDMAKKLPVY   |
| Gallus gal | FHILFVLFVW    | TYWKSIFTLP          | VQPGKKYHMS                  | YADKERYENE  | ERPEVQRQIL  | AEIARKLPVY   |
| Calidris p | FHILFVLFVW    | TYWKSIFTLP          | VQPGKKYHMS                  | YADKERYENE  | ERPEVQRQIL  | AEMARKLPVY   |
| Anas platy | FHILFVLFVW    | TYWKSIFTLP          | VQPGKKYHMS                  | YADKERYENE  | ERPEVQRQIL  | AEIARKLPVY   |
|            |               |                     | <b>Cysteine-rich domain</b> |             |             |              |
|            | 125           | 135                 | 145                         | 155         | 165         | 175          |
| Homo sapie | TRTGS GAVRF   | CDRC HLIKPD         | RCH HCSVCAM                 | CVLKMDH HCP | WVNNCIGFSN  | YKFF LQFLAY  |
| Sus scrofa | TRTGS GAVRF   | CDRC HLIKPD         | RCH HCSVCAM                 | CVLKMDH HCP | WVNNCIGFSN  | YKFF LQFLAY  |
| Gallus gal | TRTGS G GIRF  | CDRC Q LIKPD        | RCH HCSVCAT                 | CVLKMDH HCP | WVNNCIGFSN  | YKFF L LFLAY |
| Calidris p | TRTGS G GIRF  | CDRC Q LIKPD        | RCH HCSVCAT                 | CVLKMDH HCP | WVNNCIGFSN  | YKFF L LFLAY |
| Anas platy | TRTG N G GIRF | CDRC Q LIKPD        | RCH HCSVCAT                 | CVLKMDH HCP | WVNNCIGFSN  | YKFF L LFLAY |
|            |               | <b>Zinc-binding</b> |                             | <b>DHHC</b> |             | <b>TMR3</b>  |
|            | 185           | 195                 | 205                         | 215         | 225         | 235          |
| Homo sapie | SVLYCYLIAT    | TVFSYFIKYW          | RGELPSVRSK                  | FHVLFLLFVA  | CMFFVSLVIL  | FGYHCWLVS R  |
| Sus scrofa | SVLYCLYIAT    | TVFSYFIKYW          | RGELPSVRSK                  | FHVLFLLFVA  | CMFFVSLVIL  | FGYHCWLVS R  |
| Gallus gal | SLLYCLYIAA    | TVFKYFIKYW          | TGELTNGRSK                  | FHILFLLFLA  | VMFFVSLMFL  | FGYHCWLVS R  |
| Calidris p | SLLYCLYIAA    | TVFKYFIKYW          | TGELTNGRSK                  | FHILFLLFLA  | IMFFVSLMFL  | FGYHCWLVS R  |
| Anas platy | SLLYCLYIAA    | TVFKYFIKYW          | TGELTNGRSK                  | FHVLFLLFVA  | VMFFVSLMFL  | FGYHCWLVS R  |
|            | 245           | 255                 | 265                         | 275         | 285         | 295          |
| Homo sapie | NKT TLEAFCT   | PVFTSGPEKN          | GFNLGFIKNI                  | QQVFGDKKKF  | WLPIPIGSSPG | DGHSFPMRSM   |
| Sus scrofa | NKT TLEAFCT   | PVFTSGPEKN          | GFNLGFIKNI                  | QQVFGDNKKF  | WLPIPIGSSPG | DGHSFPMRSM   |
| Gallus gal | NRSTLEAFST    | PVFQNGPDKN          | GFNLGFVKNL                  | QQVFGEEKKL  | WLLPIASSQG  | DGHFFPMRAL   |
| Calidris p | NRSTLEAFSA    | PVFQNGPDKN          | GFNLGFVKNL                  | QQVFGEEKKL  | WLLPIASSQG  | DGHFFPMRAL   |
| Anas platy | NRSTLEAFSA    | PVFQNGPDKN          | GFNLGFVKNL                  | QQVFGEEKKL  | WLLPIASSQG  | DGHFFPMRAL   |
|            | 305           | 315                 | 325                         | 335         |             |              |
| Homo sapie | NESQNPLLAN    | EETWEDNEDD          | NQDYPEG-SS                  | SLAVETET    |             |              |
| Sus scrofa | NESQNPLLAN    | EEPWEDNEDD          | NRDYPEG-SS                  | SLAVETET    |             |              |
| Gallus gal | CEAQNPLLSN    | EEQWEDDGID          | EEPHDSGEAA                  | SLAIETET    |             |              |
| Calidris p | CEAQNPLLAN    | EEQWEDDGID          | EEPHDSGEAS                  | SLAIETET    |             |              |
| Anas platy | CEAQNPLLAN    | EEQWEDDGID          | EEPHDSTEAS                  | SLAIETET    |             |              |

Amino acid alignment of DHHC15 of humans (homo sapiens), pigs (sus scrofa) and three avian species: chicken (gallus gallus), sandpiper (Calidris pugnax) and mallard duck (Anas platyrhynchos). The transmembrane region is highlighted in grey, individual residues that contact the acyl chain in the cavity are highlighted in green and the two (S, Y) that seal the cavity are highlighted in pink. The amphiphilic helix following TMR4 is also highlighted in grey. Cys and His

residues that coordinate zinc ions, the DHHC motif and the TTEX motif are highlighted in light blue in the human sequence. NESQ is the end of the resolved structure. Amino acid differences to human DHHC15 are highlighted in yellow in the sequence of the respective species and the non-conservative exchanges labeled in the 3D-structure of DHHC15 are in red.

**Table S10: Amino acid differences between human DHHC8 and DHHC8 from animal hosts of Flu A**

|            |             |             |                      |             |              |             |            |             |            |            |            |      |   |        |
|------------|-------------|-------------|----------------------|-------------|--------------|-------------|------------|-------------|------------|------------|------------|------|---|--------|
|            | ..... ..... | ..... ..... | ..... .....          | ..... ..... | ..... .....  | ..... ..... |            |             |            |            |            |      |   |        |
|            | 5           | 15          | 25                   | 35          | 45           | 55          |            |             |            |            |            |      |   |        |
| Homo sapie | MPRSPGTRLK  | PAKYIPVATA  | AALLVGSSTL           | FFVFTCPWLT  | RAVSPAVPVY   | NGIIFLFLVLA |            |             |            |            |            |      |   |        |
| Sus scrofa | MPRSPGTRLK  | PAKYIPVATA  | AALLVGSSTL           | FFVFTCPWLT  | RAVSPAVPVY   | NGILFLFLVLA |            |             |            |            |            |      |   |        |
| Gallus gal | MPSTGKRFK   | PTKYIPVSTA  | AALLVGSTTL           | FFVFTCPWLT  | KAISPAIPVY   | NGLVFLFLVLA |            |             |            |            |            |      |   |        |
| Calidris p | -----       | -----       | -----                | -----       | -----        | -----       |            |             |            |            |            |      |   |        |
| Anas platy | MPSTGKRFK   | PTKYIPVSTA  | AALLVGSTTL           | FFVFTCPWLT  | KAISPAIPVY   | NGLVFLFLVLA |            |             |            |            |            |      |   |        |
|            |             |             | TMR1                 |             |              | TMR2        |            |             |            |            |            |      |   |        |
|            | ..... ..... | ..... ..... | ..... .....          | ..... ..... | ..... .....  | ..... ..... |            |             |            |            |            |      |   |        |
|            | 65          | 75          | 85                   | 95          | 105          | 115         |            |             |            |            |            |      |   |        |
| Homo sapie | NFSMATFMDP  | GVFPRADEDE  | DKEDDFRAPL           | YKNVDVRGIQ  | VRMKWCATCH   | FYRPPRCSHC  |            |             |            |            |            |      |   |        |
| Sus scrofa | NFSMATFMDP  | GVFPRADEDE  | DKEDDFRAPL           | YKNVDVRGIQ  | VRMKWCATCH   | FYRPPRCSHC  |            |             |            |            |            |      |   |        |
| Gallus gal | NFSMATFMDP  | GVFPRADEDE  | DKDDFRAPL            | YKNVEIKGIQ  | VRMKWCATCH   | FYRPPRCSHC  |            |             |            |            |            |      |   |        |
| Calidris p | ---MATFMDP  | GVFPRADEDE  | DKDDFRAPL            | YKNVEIKGIQ  | VRMKWCATCH   | FYRPPRCSHC  |            |             |            |            |            |      |   |        |
| Anas platy | NFSMATFMDP  | GVFPRADEDE  | DKDDFRAPL            | YKNVEIKGIQ  | VRMKWCATCH   | FYRPPRCSHC  |            |             |            |            |            |      |   |        |
|            |             |             | Cysteine-rich domain |             | zinc-binding |             |            |             |            |            |            |      |   |        |
|            | ..... ..... | ..... ..... | ..... .....          | ..... ..... | ..... .....  | ..... ..... |            |             |            |            |            |      |   |        |
|            | 125         | 135         | 145                  | 155         | 165          | 175         |            |             |            |            |            |      |   |        |
| Homo sapie | SVCDNCVEDF  | DHHC        | PWVNNC               | IGRRNYRYFF  | LFLLSLSAHM   | VG          | VVAFGLVY   | VLN         | HAEGLGA    |            |            |      |   |        |
| Sus scrofa | SVCDNCVEDF  | DHHC        | PWVNNC               | IGRRNYRYFF  | LFLLSLSAHM   | VG          | VVAFGLVY   | VLN         | HAEGLGA    |            |            |      |   |        |
| Gallus gal | SVCDNCVEDF  | DHHC        | PWVNNC               | IGRRNYRYFF  | LFLLSLS      | THM         | VG         | VFTFGLIF    | VLNHMEKLGA |            |            |      |   |        |
| Calidris p | SVCDNCVEDF  | DHHC        | PWVNNC               | IGRRNYRYFF  | LFLLSLS      | THM         | VG         | VFTFGLIF    | VLNHMEKLGA |            |            |      |   |        |
| Anas platy | SVCDNCVEDF  | DHHC        | PWVNNC               | IGRRNYRYFF  | LFLLSLS      | THM         | VG         | VFTFGLIF    | VLNHMEKLGA |            |            |      |   |        |
|            |             | DHHC        |                      | TMR3        |              |             |            |             |            |            |            |      |   |        |
|            | ..... ..... | ..... ..... | ..... .....          | ..... ..... | ..... .....  | ..... ..... |            |             |            |            |            |      |   |        |
|            | 185         | 195         | 205                  | 215         | 225          | 235         |            |             |            |            |            |      |   |        |
| Homo sapie | AHTTITMAVM  | CVAGLFFIPV  | IGLTGFHVVL           | VTGR        | TINEQ        | VTGKFRGGVN  | P          | FTRG        | CCGNV      |            |            |      |   |        |
| Sus scrofa | AHTTITMAVM  | CVAGLFFIPV  | IGLTGFHVVL           | VTGR        | TINEQ        | VTGKFRGGVN  | P          | FTRG        | CYGNV      |            |            |      |   |        |
| Gallus gal | AHTTITMAVM  | CVAGLFFIPV  | IGLTGFHIVL           | VARGRTTNEQ  | VTGKFRGGVN   | P           | FTRG       | CCGNV       |            |            |            |      |   |        |
| Calidris p | AHTAITMAVM  | CVAGLFFIPV  | IGLTGFHIVL           | VARGRTTNEQ  | VTGKFRGGVN   | P           | FTRG       | CCGNV       |            |            |            |      |   |        |
| Anas platy | AHTTITMAVM  | CVAGLFFIPV  | IGLTGFHIVL           | VARGRTTNEQ  | VTGKFRGGVN   | P           | FTRG       | CCGNV       |            |            |            |      |   |        |
|            |             |             | TMR4                 | TTXE        |              |             |            | amphiphilic |            |            |            |      |   |        |
|            | ..... ..... | ..... ..... | ..... .....          | ..... ..... | ..... .....  | ..... ..... |            |             |            |            |            |      |   |        |
|            | 245         | 255         | 265                  | 275         | 285          | 295         |            |             |            |            |            |      |   |        |
| Homo sapie | EHVLCSP     | LAP         | -----                | -----       | RYVVE        | PPRLPLAVSL  | KPPFLRPELL | DRAAPLKVKL  |            |            |            |      |   |        |
| Sus scrofa | EHVLCSP     | LAP         | -----                | -----       | RYVVE        | PPRLPLAVRL  | KPPFLRPELL | ERAPLKVKL   |            |            |            |      |   |        |
| Gallus gal | EHVLCSP     | LAP         | SLLHLPLQGS           | CFMITRY     | IIVE         | P-KKKLAVSV  | KPPFLRP    | DLS         | ER--QITVKI |            |            |      |   |        |
| Calidris p | EHVLCSP     | LAP         | -----                | -----       | RYIIVE       | P-KKKQAVSV  | KPPFLRP    | DLS         | ER--QITVKI |            |            |      |   |        |
| Anas platy | EHVLCSP     | LAP         | S-LHLPPQGS           | CFMLTRY     | IIVE         | P-KKKQAVSV  | KPPFLRP    | DLS         | ER--QITVKI |            |            |      |   |        |
|            |             | helix       |                      |             |              |             |            |             |            |            |            |      |   |        |
|            | ..... ..... | ..... ..... | ..... .....          | ..... ..... | ..... .....  | ..... ..... |            |             |            |            |            |      |   |        |
|            | 305         | 315         | 325                  | 335         | 345          | 355         |            |             |            |            |            |      |   |        |
| Homo sapie | SDNGLKAGLG  | RSKSKGSLDR  | LDEKPLDLGP           | PLPPKIEAGT  | FSSDLQTPRP   | GSAESALS    | VQ         |             |            |            |            |      |   |        |
| Sus scrofa | SDNGLKAGLG  | RSKSKGSLDR  | LDEKPLDLGP           | PLPPKAEAST  | FGSD         | LQTPRP      | GSAESALS   | AH          |            |            |            |      |   |        |
| Gallus gal | SDNGIQANLN  | RSKSKISLEG  | LEDKGM               | DVQ         | P            | PLPPKGDQSK  | Y-SELKGQLG | TSEESGLSPK  |            |            |            |      |   |        |
| Calidris p | SDNGIQANLN  | RSKSKISLEG  | LED                  | TSM         | DVQ          | P           | PLPPKGDPSK | Y-SELKGQLG  | TGEEGSLSPK |            |            |      |   |        |
| Anas platy | SDNGIQANLN  | RSKSKISLEG  | LED                  | KSM         | DVQ          | P           | PLPPKGDQSK | Y-SELKGQLG  | TCEEGLSPK  |            |            |      |   |        |
|            | ..... ..... | ..... ..... | ..... .....          | ..... ..... | ..... .....  | ..... ..... |            |             |            |            |            |      |   |        |
|            | 365         | 375         | 385                  | 395         | 405          | 415         |            |             |            |            |            |      |   |        |
| Homo sapie | RTSPPTPAMY  | KFRPAFPTGP  | KVPFCGPGEQ           | VPGPDSLTLG  | ---DDSI      | RSL         | DFVSEPS    | LDL         |            |            |            |      |   |        |
| Sus scrofa | RTSPPTPAMY  | KFRPNFPTGP  | KAPFCGPGEQ           | VTG         | DSLTLG       | ---DDSI     | HSL        | DFASEPS     | LDL        |            |            |      |   |        |
| Gallus gal | LISPTPAMY   | KYRPAFSNNP  | KVHYHAAAEQ           | ITLQEGHSQ   | ALIEED       | DGRSL       | DYQSEPS    | LDI         |            |            |            |      |   |        |
| Calidris p | LISPTPAMY   | KYRPAFSNNP  | KVHYHATAEQ           | ITMQEGHSQ   | ALIEED       | DGRSL       | DYQSEPS    | LDI         |            |            |            |      |   |        |
| Anas platy | LISPTPAMY   | KYRPAFSNNP  | KVHYHAAAEQ           | ITMQEGHSQ   | ALIEED       | DGGS        | DYQSEPS    | LDI         |            |            |            |      |   |        |
|            | ..... ..... | ..... ..... | ..... .....          | ..... ..... | ..... .....  | ..... ..... |            |             |            |            |            |      |   |        |
|            | 425         | 435         | 445                  | 455         | 465          | 475         |            |             |            |            |            |      |   |        |
| Homo sapie | PDYGP       | GGLHA       | AYPSPPLSA            | SDAFSGALRS  | LSLKASSRRG   | GDHVALQPLR  | SEGGPPTPHR |             |            |            |            |      |   |        |
| Sus scrofa | PDY         | P           | GGLHA                | AYPSPPLSA   | AD           | T           | FSGALRS    | LSLKAA      | SRRG       | GDHVALQPLR | SEGGPPTPHR |      |   |        |
| Gallus gal | PSYRKSS     | SLHK        | TYQSSP               | --LQ        | IDSF         | AIN         | SRS        | LSLK        | SAGRRG     | TDKV       | PLHPIK     | SEGA | A | ASTPYK |
| Calidris p | PSYRKSS     | SLHK        | TYQSSP               | --LQ        | IDSF         | AIN         | SRS        | LSLK        | SAGRRG     | TEKV       | PLHPIK     | SEGA | A | ASTPYK |
| Anas platy | PSYRKSS     | SLHK        | TYQSSP               | --LQ        | IDSF         | AIN         | SRS        | LSLK        | SAGRRG     | TDKV       | PLHPIK     | SEGA | A | ASTPYK |

|            |             |            |            |             |            |            |
|------------|-------------|------------|------------|-------------|------------|------------|
|            | 485         | 495        | 505        | 515         | 525        | 535        |
| Homo sapie | SIFAPHALPN  | RNGSLSYDSL | LNPGPSGGHA | CPAHPAVGVA  | GYHSPYLHPG | AT----GDPP |
| Sus scrofa | GLFAPHALPN  | RNGSLSYDSL | LNPGPSGGHA | CPAHSSAGVP  | GYRSPYLHTG | AV----GDPP |
| Gallus gal | SIFSPNSLSN  | RNGSLSYDSL | LNPMPSPGRK | CVTHSAVSSV  | GYHSPYLSAK | MCHLRGSELQ |
| Calidris p | SIFSPNSLSN  | RNGSLSYDSL | LNPMPSPGRK | CTHSAVSSV   | GYHSPYLSAK | MCHLRGSELQ |
| Anas platy | SIFSPNSLSN  | RNGSLSYDSL | LNPMPSPGRK | CTAHSVSSV   | GYHSPYLSAK | MCHLRGSELQ |
|            | 545         | 555        | 565        | 575         | 585        | 595        |
| Homo sapie | RPLPRSFSVP  | LG---PRPRE | PSPVRYDNLS | RTIMASIQR   | KDREERERLL | RSQADSLFGD |
| Sus scrofa | RPPPRSFSVP  | LG---PRPRE | PSPVRYDNLS | RTIMASIQR   | KDREERERLL | RSQADSLFGD |
| Gallus gal | RQPPQSFSPV  | LGGPAPHQRD | PSPVRYDNLS | KTIMASIQR   | KEMEEREKLL | HSHPDSVFAD |
| Calidris p | RQPPQSFSPV  | LGGPAPHQRD | PSPVRYDNLS | KTIMASIQR   | KEMEEREKLL | HSHPDSVFAD |
| Anas platy | RQPPQSFSPV  | LGGPAPHQRD | PSPVRYDNLS | KTIMASIQR   | KEMEEREKLL | HSHPDSVFAD |
|            | 605         | 615        | 625        | 635         | 645        | 655        |
| Homo sapie | SGVYDAPSSY  | SLQQASVLSE | GPRGPALRYG | SRDDLAVAGPG | FGGARNPALQ | TSLSSLSSTV |
| Sus scrofa | SGVYDAPSSY  | SLQQASVLSE | GPRGPVVRFG | SRDDLAVAGPG | FGGARNPALQ | ASLSSLSSTV |
| Gallus gal | SGVYDTIPSSY | SLQQVSTLSE | DPRSMAMRYG | SRDNLMAATS  | FS-TRNPIIQ | SSVSSLSSAM |
| Calidris p | SGVYDTIPSSY | SLQQVSTLSE | DPRSMAMRYG | SRDNLMAATS  | FS-TRNPIIQ | SSVSSLSSAM |
| Anas platy | SGVYDTIPSSY | SLQQVSTLSE | DPRSMAMR   | -----       | -----      | -----      |
|            | 665         | 675        | 685        | 695         | 705        | 715        |
| Homo sapie | SRAPRTSSSS  | LQADQASSN- | ----APGPRP | SSGSHRSPAR  | QGLPSPPGTP | HSPSYAGPKA |
| Sus scrofa | SRAPRTSSSS  | LQADLANSS- | ----APGARP | ASGSHRSPAR  | QVPPSPPGTP | RSPSYAGPKA |
| Gallus gal | TRAPRTSTTS  | LQADLANNNV | QTHQALQGRV | SNGSYKSPGH  | QVPSSPTGMP | RSPSYGGPKA |
| Calidris p | TRAPRTSTTS  | LQADLANNNV | QSHQALQGRV | SNGSFKSPGH  | QVPSSPTGMP | RSPSYGGPKA |
| Anas platy | -----       | -----      | -----      | -----       | -----      | -----      |
|            | 725         | 735        | 745        | 755         | 765        | 775        |
| Homo sapie | VAFIHTDLPE  | PPPSLTVQRG | RIGTCTRGWG | RRGQPWVPPG  | LHLCHLGRPE | DRPPLRAPWS |
| Sus scrofa | VAFIHTDLPE  | PPPSLAVQRG | RIGTCSRGGW | RRGQPRVPPS  | LHLCHLGLPE | DRPPLRAPWS |
| Gallus gal | ISFVNTVEIT  | EVQSVGAQRD | DIQMKTPHKS | INGQP----   | KGISRLG--S | TSSSQGTPVS |
| Calidris p | VSFVNTVEIT  | EVQSVGAQRD | DMQLKTPHKS | INGQP----   | KGISRLG--S | TSSSQGTPVS |
| Anas platy | -----       | -----D     | DMQLKTPHKS | INGQP----   | KGISRLG--S | TSSSQGTPVS |
|            | 785         | 795        | 805        | 815         | 825        | 835        |
| Homo sapie | QAAGAPPRGA  | MCRLHLAASS | LFPSLSGP-- | -----       | -----      | -----      |
| Sus scrofa | BATGAPPRGA  | VCRLHSAASS | LFPSLSGPQA | GHQVGDSGAQ  | EARLPRTLGC | GLGSPLHQPH |
| Gallus gal | FAR----HSN  | VKKVSGVGGT | TYEISV---- | -----       | -----      | -----      |
| Calidris p | FAR----HSN  | VKKVSGVGGT | TYEISV---- | -----       | -----      | -----      |
| Anas platy | FAR----HSN  | VKKVSGVGGT | TYEISV---- | -----       | -----      | -----      |
| Homo sapie | --          |            |            |             |            |            |
| Sus scrofa | Ld          |            |            |             |            |            |
| Gallus gal | --          |            |            |             |            |            |
| Calidris p | --          |            |            |             |            |            |
| Anas platy | --          |            |            |             |            |            |

Amino acid alignment of DHHC8 of humans (homo sapiens), pigs (sus scrofa) and three avian species, chicken (gallus gallus), sandpiper (Calidris pugnax) and mallard duck (Anas platyrhynchos). The transmembrane regions and the amphiphilic helix following TMR4 are highlighted in grey. Cys and His residues that coordinate zinc ions, the DHHC motif and the TTEX motif are highlighted in light blue. Most of the C-terminal region is predicted to be unstructured (underlined). Amino acid differences to human DHHC2 are highlighted in yellow in the sequence of the respective species.

**Table S11: Amino acid differences between human DHHC20 and DHHC20 of animal hosts of Flu A**

|            |                 |                     |                             |             |             |             |
|------------|-----------------|---------------------|-----------------------------|-------------|-------------|-------------|
|            | .... ....       | .... ....           | .... ....                   | .... ....   | .... ....   | .... ....   |
|            | 5               | 15                  | 25                          | 35          | 45          | 55          |
| Homo sapie | MAPWTLWRCC      | QRVVGWVPVL          | FITFVVVWSY                  | YAYVVELCVF  | TIFGNEENGK  | TVVYLVAFHL  |
| Sus scrofa | MAPCTLWRCC      | QRSVGWVPVL          | FITFVVVWSY                  | YAYVVELCVF  | TLGNGENGK   | AVVYLVAFHL  |
| Gallus gal | MAPSHVLKCC      | QRVLAWVPV           | FIALVVAWSY                  | YAYVVELCVF  | TISSTAEEK-- | -VVYLVI FHL |
| Calidris p | MAPSHVLKCC      | QKVLAWVPVA          | FIALVVAWSY                  | YAYVVELCMF  | TISSTAEEK-- | -VVYLVI FHL |
| Anas platy | MAPPR-VKCC      | QKVLAWLPV           | FIALVVAWSY                  | YAYVVELCLF  | TISSTAEEK-- | -VVYLVI FHL |
|            |                 |                     | <b>TMR1</b>                 |             |             | <b>TMR2</b> |
|            | .... ....       | .... ....           | .... ....                   | .... ....   | .... ....   | .... ....   |
|            | 65              | 75                  | 85                          | 95          | 105         | 115         |
| Homo sapie | FFVMFVWSYW      | MTIFTSPASP          | SKEFYLSNSE                  | KERYEKEFSQ  | ERQQEILRRA  | ARALPIYTTS  |
| Sus scrofa | FFVMFVWSYW      | MTIFTSPASP          | SKEFYLSSE                   | KERYEKEFSQ  | ERQQEILRRA  | ARGLPYTTS   |
| Gallus gal | SFVMFVWSYG      | KTIFTSPASP          | SNEFCLS KAD                 | KEQYEKE ERP | ESQQEILRRA  | AKDLPIYTTS  |
| Calidris p | SFVMFVWSYW      | KTIFTSPASP          | SNEFCLS KAD                 | KEQYEKE ERP | ESQQEILRRA  | AKDLPIYTTS  |
| Anas platy | SFVMFVWSYW      | KTIFTSPASP          | SNEFCLS KAD                 | KEQYEKE ERP | EFQQEILRRA  | AKDLPI TTT  |
|            |                 |                     | <b>Cysteine-rich domain</b> |             |             |             |
|            | .... ....       | .... ....           | .... ....                   | .... ....   | .... ....   | .... ....   |
|            | 125             | 135                 | 145                         | 155         | 165         | 175         |
| Homo sapie | ASKTIRYCEK      | CQLIKPDRAH          | HCSACDS CIL                 | KMDHHC PWVN | NCVGFSNYKF  | FLLFLLYSLL  |
| Sus scrofa | ATQTIRYCER      | CQLIKPDRAH          | HCSACD ICVL                 | KMDHHC PWVN | NCVGFSNYKF  | FLLFLLYSLL  |
| Gallus gal | ASRAIRYCDR      | CQLIKPDRCH          | HCSACD ICVL                 | KMDHHC PWVN | NCVGFSNYKF  | FLLFLMYSL   |
| Calidris p | ASRAIRYCDR      | CQLIKPDRCH          | HCSACD ICVL                 | KMDHHC PWVN | NCVGFSNYKF  | FLLFLMYSL   |
| Anas platy | ASRAIRYCDR      | CQLIKPDRCH          | HCSACD ICVL                 | KMDHHC PWVN | NCVGFSNYKF  | FLLFLMYSL   |
|            | <b>Acyl-CoA</b> | <b>Zinc-binding</b> |                             | <b>DHHC</b> |             | <b>TMR3</b> |
|            | .... ....       | .... ....           | .... ....                   | .... ....   | .... ....   | .... ....   |
|            | 185             | 195                 | 205                         | 215         | 225         | 235         |
| Homo sapie | YCLFVAATVL      | EYFIKFWTNE          | LTDTRAKFHV                  | LFLFFVSAME  | FISVLSLFSY  | HCWLVGKNRT  |
| Sus scrofa | YCLFVAATTVL     | QYFIKFWTNE          | LSDTRAKFHV                  | LFLFFVSTMF  | FISVLSLFSY  | HCWLVGKNRT  |
| Gallus gal | YCLFVAATVL      | QYFIKFWTNE          | LPDTHAKFHV                  | LFLFFVAAMF  | FISILSLFSY  | HCWLVGKNRS  |
| Calidris p | YCLFVAATVL      | QYFIKFWTNE          | LPDTHAKFHV                  | LFLFFVAAMF  | FISILSLFSY  | HCWLVS KNRS |
| Anas platy | YCLFVAATVL      | QYFIKFWTKE          | LTDAYAKYHI                  | LCLFFVA AIA | FIGIQWLFSY  | HCWLVGKNRS  |
|            |                 |                     |                             | <b>TMR4</b> |             |             |
|            | .... ....       | .... ....           | .... ....                   | .... ....   | .... ....   | .... ....   |
|            | 245             | 255                 | 265                         | 275         | 285         | 295         |
| Homo sapie | TIESFRAPTF      | SYGPDGNGFS          | LGCSKNWRQV                  | FGDEKKYWLL  | PIFSSLGDGC  | SFPTRLVGMD  |
| Sus scrofa | TIESFRAPTF      | SYGPDGNGFS          | LGCSKNWRQV                  | FGDEKKYWLL  | PVFSSQGDGC  | SFPTRLVGT   |
| Gallus gal | TIETFRAPTF      | RNGPDKNGFS          | LGCSKNLREV                  | FGDEKKYWLL  | PIFTSLGDGC  | NFPTRLVIMD  |
| Calidris p | TIETFRAPTF      | RNGPDKNGFS          | LGCSKNLREV                  | FGDEKKYWLL  | PIFTSLGDGC  | NFPTRLVIMD  |
| Anas platy | TIESHRAPMF      | RNGPDENGFS          | LGYGKNLREV                  | FGDEKKYWLL  | PIFTSLGDGC  | NFPTRLVIMD  |
|            | <b>TTXE</b>     |                     | <b>amphiphilic helix</b>    |             |             |             |
|            | .... ....       | .... ....           | .... ....                   | .... ....   | .... ....   | .... ....   |
|            | 305             | 315                 | 325                         | 335         | 345         | 355         |
| Homo sapie | PEQASVTNQ       | EYARSSGSNQ          | PFPI-KPLSE                  | SKNRLLDSES  | QWLENGAEEG  | IVKSGTNNHV  |
| Sus scrofa | PEQASVSNQS      | ESGRS IGSNQ         | PFPI-KPLSE                  | SKNRLLDSES  | QWLEDGAEEG  | VVRPGTNNHV  |
| Gallus gal | PEQVTVSSQN      | EPAKSSGANQ          | PFPPTRPLSE                  | SNRLLASDS   | QWVESGPEDE  | NVKSGTKKHI  |
| Calidris p | PEQLAVSSQN      | EPAKSSGANQ          | TFPP-RPLSE                  | SNRLLANDS   | QWVESGPEEE  | NVKSGAKKHI  |
| Anas platy | PERVTVSTQT      | EPAKSSGASQ          | PFPP-QPLSE                  | SOVRLASDD   | QWVEIDPEEE  | NVK-----    |
|            | .... .          |                     |                             |             |             |             |
|            | 365             |                     |                             |             |             |             |
| Homo sapie | TVAIEN          |                     |                             |             |             |             |
| Sus scrofa | TVAIEN          |                     |                             |             |             |             |
| Gallus gal | IVSLES          |                     |                             |             |             |             |
| Calidris p | IVSLES          |                     |                             |             |             |             |
| Anas platy | -----           |                     |                             |             |             |             |



Amino acid alignment of DHHC20 of humans (*homo sapiens*), pigs (*sus scrofa*) and three avian species, chicken (*gallus gallus*), sandpiper (*Calidris pugnax*) and mallard duck (*Anas platyrhynchos*). The transmembrane regions are highlighted in grey, individual residues that contact the acyl chain in the cavity are highlighted in green and the two (S and T) that seal the cavity are highlighted in pink. The amphiphilic helix following TMR4 is also highlighted in grey. Cys and His residues that coordinate zinc ions, the DHHC motif and the TTEX motif are highlighted in light blue and basic residues involved in acyl-CoA binding are highlighted in green. LVGM is the end of the resolved DHHC20 structure. Amino acid differences to human DHHC2 are highlighted in yellow in the sequence of the respective species and the non-conservative exchanges labeled in the 3D-structure of DHHC20 are in red.

**Table S12: Amino acid differences between human DHHC8 and DHHC8 from animal hosts of  $\beta$ -CoVs**

10 20 30 40 50 60 70

Human MPRSPGTRLKPAKYIPVATAAALLVGSSTLFFVFT-----

Rhinolophus Sinicus MPRSPGTRLKPAKYIPVATAAALLVGSSTLFFVFT-----

Pipistrellus Kuhlii MPRSPGTRLKPAKYIPVATAAALLIGSSTLFFVFT-----

Camelus Dromedarius MPRSPGTRLKPAKYIPVATAAALLVGSSTLFFVFT-----

Manis Javanica MPRSPGTRLKPAKYIPVATAAALLVGSSALFFVFTLTWALLEALTVRPTSDFRGGRMSLSLTRPQAAGPE

TMR1

80 90 100 110 120 130 140

Human -----CPWLTRAVSPAVPVYNGIIFLFLVLANFSMATFMDPGVFPRADE

Rhinolophus Sinicus -----CPWLTRAVSPAVPVYNGIIFLFLVLANFSMATFMDPGIFPRADE

Pipistrellus Kuhlii -----CPWLTHAVSPAVPVYNGIIFLFLVLANFSMATFMDPGVFPRADE

Camelus Dromedarius -----CPWLTRAVSPAVPVYNGIIFLFLVLANFSMATFMDPGVFPRADE

Manis Javanica AAAPCQVPSPPSALLTAGALGSGTPALCPWLTRAVSPAVPVYNGIIFLFLVLANFSMATFMDPGVFPRADE

TMR2

150 160 170 180 190 200 210

Human DEDKEDDFRAPLYKNVDVRGIQVRMKWCATCHFYRPPRCHCSVCDNCVEDFDHHC PWVNNCIGRNYRY

Rhinolophus Sinicus DEDKEDDFRAPLYKNVDVRGIQVRMKWCATCHFYRPPRCHCSVCDNCVEDFDHHC PWVNNCIGRNYRY

Pipistrellus Kuhlii DEDKEDDFRAPLYKNVDVRGIQVRMKWCATCHFYRPPRCHCSVCDNCVEDFDHHC PWVNNCIGRNYRY

Camelus Dromedarius DEDKEDDFRAPLYKNVDVRGIQVRMKWCATCHFYRPPRC-PLQRCDNCAQDFDHHC PWVNNCIGRNYRY

Manis Javanica DEDKEDDFRAPLYKNVDVRGIQVRMKWCATCHFYRPPRCHCSVCDSCVEDFDHHC PWVNNCIGRNYRY

Zinc-binding DHHC DHHC domain

220 230 240 250 260 270 280

Human FFLFLLSLSAHMVGVAAGFLVYVLNHAEGLGAAHTTITMAVMCVAGLFFIPVIGLTGFHVVLVTRGRTTN

Rhinolophus Sinicus FFLFLLSLSAHMVGVAAGFLVYVLNHAEGLGAAHTTITMAVMCVAGLFFIPVIGLTGFHVVLVTRGRTTN

Pipistrellus Kuhlii FFLFLLSLSAHMVGVAAGFLVYVLNHAEGLGAAHTTITMAVMCVAGLFFIPVIGLTGFHVVLVTRGRTTN

Camelus Dromedarius FFLFLLSLSAHMVGVAAGFLVYVLHAEGLGAAHTTITMAVMCVAGLFFIPVIGLTGFHVVLVTRGRTTN

Manis Javanica FFLFLLSLSAHMVGVAAGFLVYVLNHAEGLGATHTTVTMAVMGVAGLFFIPVIGLTGFHVVLVTRGRTTN

TMR3 TMR4 TTXE

290 300 310 320 330 340 350

Human EQVTGKFRGGVNPFTRGCCGNVEHVLCSPLAPRYVVEPP-RLPLAVSLKPPFLRPELLDRAAPLKVKLSLSD

Rhinolophus Sinicus EQVTGKFRGGVNPFTRGCYGNVEHVLCSPLAPRYVVEPP-RLPLAARLKPPFLRPELLERAAPLKVKLSLSD

Pipistrellus Kuhlii EQVTGKFRGGVNPFTRGCYGNVEHVLCSPLAPRYVVEPPRLPLAARLKPPFLRPELLDRAAPLKVKLSLSD

Camelus Dromedarius EQVTGKFRGGVNPFTRGCYGNVEHVLCSPLAPRYVVRAA-RLPLAARLKPPFLRPELLERAAPLKVKLSLSD

Manis Javanica EQVTGKFRGGVNPFTRGCYGNVEHVLCSPLAPRYVVEPPQLPLATRLKPPFLRPELLGRAAPLKVKLSLSD

amphiphilic helix

|                     |                                                                               |     |     |     |     |     |     |
|---------------------|-------------------------------------------------------------------------------|-----|-----|-----|-----|-----|-----|
|                     | 360                                                                           | 370 | 380 | 390 | 400 | 410 | 420 |
| Human               | ..... ..... ..... ..... ..... ..... ..... ..... ..... ..... ..... ..... ..... |     |     |     |     |     |     |
|                     | NGLKAGLGRSKSKGSLDRLDEKPLDLGPPLPPKIEAGTFSSDLQTPRPGSAESALSQVORTSPPTPAMYKF       |     |     |     |     |     |     |
| Rhinolophus Sinicus | NGLKASLGHSKSKGSLDRLDEKPLDLGPPLPPKAEAVTFSGDRQTPRPGSAESTLSAQRTSPPTPAMYKF        |     |     |     |     |     |     |
| Pipistrellus Kuhlui | NGLKAGLGRSKSKGSLDRLDEKPLDLGPPLPPKPEAGTFGGDRQTPRPGSAESALSAQRTSPPTPAMYKF        |     |     |     |     |     |     |
| Camelus Dromedarius | NGLKAGLGRSKSKGSLDRLDEKPLDLGPPLPPKAEAGTFASDLQTPRPGSAESALSAQRTSPPTPAMYKF        |     |     |     |     |     |     |
| Manis Javanica      | NGLKASLGRSKSKGSLDRLDEKPLDLGPPLPSKVEVGTFGSNLQTPRPGSAESALKVQRTSPPTPAMYKF        |     |     |     |     |     |     |
|                     | 430                                                                           | 440 | 450 | 460 | 470 | 480 | 490 |
| Human               | ..... ..... ..... ..... ..... ..... ..... ..... ..... ..... ..... ..... ..... |     |     |     |     |     |     |
|                     | RPAFPTGPKVPFCGPGEQVPGPDSLTLGDDSIIRSLDFVSEPSLDLPDYGGPG-LHAAYPPSPPLSASDAF       |     |     |     |     |     |     |
| Rhinolophus Sinicus | RPTTFPMGPKAPFCGPGEQVPGPDSLALGEDSIHSLDFTSEPNLDLPDYTPGG-LHTAYPPSPPLSASDTF       |     |     |     |     |     |     |
| Pipistrellus Kuhlui | RPAFPAGPKAPFCGPGEQVSGPDSLTLGEDSIHSLDFTSEPSLDLPDFAAGGGLHAPYAPSPPLGAADTF        |     |     |     |     |     |     |
| Camelus Dromedarius | RPAFPTGPKAPFCGPGEQVTGPDSLTLGEDSIHSLDFASEPSLDLPDYPPSG-LHAAYPPSPPLSATDTF        |     |     |     |     |     |     |
| Manis Javanica      | RPAFFPMGPKSPFCGPGEQVPGPDSLTLGEDSVHGLDFTSEPHLDLPDYPPGG-LHAAYPPSPQLSVADTF       |     |     |     |     |     |     |
|                     | 500                                                                           | 510 | 520 | 530 | 540 | 550 | 560 |
| Human               | ..... ..... ..... ..... ..... ..... ..... ..... ..... ..... ..... ..... ..... |     |     |     |     |     |     |
|                     | SGALRSLSLKASSRRGGDHVALQPLRSEGGPPTPHRSIFAPHALPNRNGSLSYDSLNNPGSPGGHACPAH        |     |     |     |     |     |     |
| Rhinolophus Sinicus | SGALRSLSLKAASRRGGDHTIALQSLRSEGGPPTPHRSIFAPHALSNRNGSLSYDSLNNPGSPSGHACPAH       |     |     |     |     |     |     |
| Pipistrellus Kuhlui | SGALRSLSLKAAGRRGGDHVALQPLRSEGGPPTPHRGVGFAPHALPNRNGSLSYDSLSPASPGGRACPAH        |     |     |     |     |     |     |
| Camelus Dromedarius | SGALRSLSLKAASRRGGDHMALQPLRSEGGPPTPHRSIFPSHALPNRNGSLSYDSLNNPGSPGGHTCPAH        |     |     |     |     |     |     |
| Manis Javanica      | SGALRSLSLKAAGRGRGDHVALQPLRSEGGPPTPHRGIFAPHALPNRNGSLSYDSLDPGSPGGHACPAH         |     |     |     |     |     |     |
|                     | 570                                                                           | 580 | 590 | 600 | 610 | 620 | 630 |
| Human               | ..... ..... ..... ..... ..... ..... ..... ..... ..... ..... ..... ..... ..... |     |     |     |     |     |     |
|                     | PAVG-VAGYHSPYLHPGATGDDPPRPLPRSFSPVLGPRPREPSPVRYDNLSTIMASIQERKDREERERLL        |     |     |     |     |     |     |
| Rhinolophus Sinicus | PSAG-MASYRSPYLHPGAVGDPPRPPRSFSPVLGPRPREPSPVRYDNLSTIMASIQERKDREERERLL          |     |     |     |     |     |     |
| Pipistrellus Kuhlui | PAAGGLAGYRSPYLHP---GDPPRPPRSFSPVLGPRPREPSPVRYDNLSTIMASIQERKDREERERLL          |     |     |     |     |     |     |
| Camelus Dromedarius | PSAG-VAGYRAPYLHAGAVGDPPRPPRSFSPVLGPRPREPSPVRYDNLSTIMASIQERKDREERERLL          |     |     |     |     |     |     |
| Manis Javanica      | PPAG-MASYRSPYLHPGSVGDPPRPPRSFSPVLGSRPREPSPVRYDNLSTIMASIQERKDREEHQRLL          |     |     |     |     |     |     |
|                     | 640                                                                           | 650 | 660 | 670 | 680 | 690 | 700 |
| Human               | ..... ..... ..... ..... ..... ..... ..... ..... ..... ..... ..... ..... ..... |     |     |     |     |     |     |
|                     | RSQADSLFGDSGVYDAPSSSYSLQQAS-VLSEGPRGPALRYGSRDDLAVAGPG---FGGARNPALQTSLSL       |     |     |     |     |     |     |
| Rhinolophus Sinicus | RSQADSLFGDSGVYDAPSSSYSLQQAS-VLSEGPRGPALHYGSRDDLAVAGPS---FRGARNPALQTSLSL       |     |     |     |     |     |     |
| Pipistrellus Kuhlui | RSQADSLFGDAGAYDAPGSYGLQQAAGALSEGPRGPAAARYGSRDDLAVAGPGGAGFGGARNPALQASVTS       |     |     |     |     |     |     |
| Camelus Dromedarius | RSQADSLFGDSGVYDAPSSSYSLQQAS-VLSEGPRGPALRYGSRDDLAVAGPG---FGGARNPALQASLSL       |     |     |     |     |     |     |
| Manis Javanica      | RSQADSLFGDSGVYDAPSSSYSLQQAG-VLAEGPRGPVLRCGSRDDLAVAGPG---FGGARNPALQTSLSL       |     |     |     |     |     |     |
|                     | 710                                                                           | 720 | 730 | 740 | 750 | 760 | 770 |
| Human               | ..... ..... ..... ..... ..... ..... ..... ..... ..... ..... ..... ..... ..... |     |     |     |     |     |     |
|                     | S-----SSVSRAPRTSSSSSLQADQASSNAPGPRPSSGSHRSPARQGLPSPP-GTPHSPSYAGPKAVAFIH       |     |     |     |     |     |     |
| Rhinolophus Sinicus | S-----SAISRAPRTSSSSSLQADLANNNAPGPRPGSASQSRSPLRQGFPSP-STOPRSPFTFMGPKAVAFIH     |     |     |     |     |     |     |
| Pipistrellus Kuhlui | SGVAAAAAGSRAPRTSSSSSLQADLANNNAPGPRPGSGEHRSPLRQGAPSP-STOPRSPSYVGPKAVAFIH       |     |     |     |     |     |     |
| Camelus Dromedarius | S-----SAVSRAPRTSSSSSLQADLTNSSAPGTRPPSGSHRSPARQVFPSP-GTPRSPSYGGPKAVAFIH        |     |     |     |     |     |     |
| Manis Javanica      | S-----SAVSRAPRTSSSSSLQADLANSNAPVPRPSSGSHRSPARQGLPSPP-GTPCSPSYFGPKAVAFVH       |     |     |     |     |     |     |

|                     | 780                                                                    | 790 | 800 | 810 | 820 | 830 | 840 |
|---------------------|------------------------------------------------------------------------|-----|-----|-----|-----|-----|-----|
| Human               | ..... ..... ..... ..... ..... ..... ..... .....                        |     |     |     |     |     |     |
| Rhinolophus Sinicus | TDLPEPPPSLTVQ-----                                                     |     |     |     |     |     |     |
| Pipistrellus Kuhlil | TDLPEPPPSLAVQ-----RG                                                   |     |     |     |     |     |     |
| Camelus Dromedarius | SDLPEPPPSLAVQ-----RG                                                   |     |     |     |     |     |     |
| Manis Javanica      | TDLPEPPPSLAMQ-----RG                                                   |     |     |     |     |     |     |
|                     | TDLPEPPPSLAVQSLCRPRASSSGDGGTDPVQENESGGHNPAANIPWVPGPWSRLGRTGPGSTRFPAQRG |     |     |     |     |     |     |

  

|                     | 850                                                                     | 860 | 870 | 880 | 890 | 900 | 910 |
|---------------------|-------------------------------------------------------------------------|-----|-----|-----|-----|-----|-----|
| Human               | ..... ..... ..... ..... ..... ..... ..... .....                         |     |     |     |     |     |     |
| Rhinolophus Sinicus | -----RDHPQLKTP--PSKLNGQSPGLARLGATGPPGPSAS--PTRHTLVKKVSGVGGTTYEISV---    |     |     |     |     |     |     |
| Pipistrellus Kuhlil | RIGTCSRGWGRRGPPRVPPGLHLCHLGLPEDRPPPLRVWSPAAGVSPRGAVCRLHLAASSLFPRFSGPER  |     |     |     |     |     |     |
| Camelus Dromedarius | -----RDHPQLKNP--PSKLNGQSPGLARLGPTAGPPGPVTS--PARHTLVKKVSGVGGTTYEISV---   |     |     |     |     |     |     |
| Manis Javanica      | WTGTCSRGWGRRGQPRAPPGLHLCHLGLPEDRPPALRASWSPAAGAPYRGAVCRLHSAASSLFPSLSGPER |     |     |     |     |     |     |
|                     | RIGTCSRGWGRRGQPWAPPGLHLCHLGLPEDRPPPLQAPRSPATRMPSRGAVCRLHSAASSLFTGLSGPER |     |     |     |     |     |     |
|                     | <u>PDZ ligand</u>                                                       |     |     |     |     |     |     |

  

|                     |     |
|---------------------|-----|
| Human               | ... |
| Rhinolophus Sinicus | DTK |
| Pipistrellus Kuhlil | --- |
| Camelus Dromedarius | DTK |
| Manis Javanica      | DTQ |

Amino acid alignment of DHHC8 proteins from humans (homo sapiens), camel (camelus dromedaries, pangolin (manis javanica) and two bat species, Rhinolophus Sinicus (host of various  $\beta$ -CoVs including SARS-1 and presumably SARS-2) and Pipistrellus Kuhlil. The transmembrane regions and the amphiphilic helix following TMR4 are highlighted in grey. Cys and His residues that coordinate zinc ions, the DHHC motif and the TTEX motif are highlighted in light blue. Most of the C-terminal region is predicted to be unstructured (underlined). Amino acid differences to human DHHC8 are highlighted in yellow in the sequence of the respective species.

Accession numbers: DHHC8 sequences of Human (NP\_037505.1), Rhinolophus Sinicus (XP\_019611479), Pipistrellus Kuhlil (XP\_036305544.1), Camelus\_Dromedarius (XP\_031299130) and Manis Javanica (XP\_036849239.1)

**Table S13: Amino acid differences between human DHHC9 and DHHC9 from animal hosts of  $\beta$ -CoVs**

Sequence logos for TMR1, TMR2, TMR3, TMR4, and TTXE across five species: Human, Rhinolophus Sinicus, Pipistrellus Kuhlii, Camelus Dromedarius, and Manis Javanica. The logos show conservation scores for each amino acid position (10-350). Key motifs are highlighted: Zinc-binding (residues 150-160), DHHC (residues 170-180), cysteine-rich domain (residues 200-210), and amphiliphic helix (residues 290-300).

**TMR1**

Human: MSVMVVRKKVTRKWEKLPGRNTFCCDGRVMMARQKGIFYLTLFLILGTCTLFFAFECRYLAVQLSPAIPV  
Rhinolophus Sinicus: MSVIVVRKKVTRKWEKLPGRNTFCCDGRVMMARQKGIFYLTLFLILGTCTLFFAFECRYLAVQLSPAIPV  
Pipistrellus Kuhlii: MSVMVVRKKVTRKWEKLPGRNTFCCDGRVMMARQKGIFYLTLFLILGTCTLFFAFECRYLAVQLSPAIPV  
Camelus Dromedarius: MSVMVVRKKVTRKWEKLPGRNTFCCDGRVMMARQKGIFYLTLFLILGTCTLFFAFECRYLAVQLSPAIPV  
Manis Javanica: MSVMVVRKKVTRKWEKLPGRNTFCCDGRVMMARQKGIFYLTLFLILGTCTLFFAFECRYLAVQLSPAIPV

**TMR2**

Human: FAAMLFLFSMATLLRTSFSDPGVIPRALPDEAAFIEMEIEATNGAVPQGRPPPRIKNFQINNQIVKLKY  
Rhinolophus Sinicus: FAAMLFLFSMATLLRTSFSDPGVIPRALPDEAAFIEMEIEATNGIVPQGRPPPRIKNFQINNQIVKLKY  
Pipistrellus Kuhlii: FAAMLFLFSMATLLRTSFSDPGVIPRALPDEAAFIEMEIEATNGAVPQGRPPPRIKNFQINNQIVKLKY  
Camelus Dromedarius: FAAMLFLFSMATLLRTSFSDPGVIPRALPDEAAFIEMEIEATNGAVPQGRPPPRIKNFQINNQIVKLKY  
Manis Javanica: FAAMLFLFSMATLLRTSFSDPGVIPRALPDEAAFIEMEIEATNGAVPQGRPPPRIKNFQINNQIVKLKY

**TMR3**

Human: CYTCKIFRPPRASHCSICDNCVERFDHHC PWVGN CVGKRNRYFYLFILSLSLLTIYVFAFNIVYVALKS  
Rhinolophus Sinicus: CYTCKIFRPPRASHCSICDNCVERFDHHC PWVGN CVGKRNRYFYLFILSLSLLTIYVFAFNIVYVALKS  
Pipistrellus Kuhlii: CYTCKIFRPPRASHCSICDNCVERFDHHC PWVGN CVGKRNRYFYLFILSLSLLTIYVFAFNIVYVALKS  
Camelus Dromedarius: CYTCKIFRPPRASHCSICDNCVERFDHHC PWVGN CVGKRNRYFYLFILSLSLLTIYVFAFNIVYVALKS  
Manis Javanica: CYTCKIFRPPRASHCSICDNCVERFDHHC PWVGN CVGKRNRYFYLFILSLSLLTIYVFAFNIVYVALKS

**TMR4**

Human: LKIGFLETCLKETPGTVLEVLCFFTLWSVVGLTGFHTFLVALNQTTNEDIKGSWTGKNRVQNPYSHGNIV  
Rhinolophus Sinicus: LKIGFLETCLKETPGTVLEVLCFFTLWSVVGLTGFHTFLVALNQTTNEDIKGSWTGKNRVQNPYSHGNIV  
Pipistrellus Kuhlii: LKIGFLETCLKETPGTVLEVLCFFTLWSVVGLTGFHTFLVALNQTTNEDIKGSWTGKNRVQNPYSHGNIV  
Camelus Dromedarius: LKIGFLETCLKETPGTVLEVLCFFTLWSVVGLTGFHTFLVALNQTTNEDIKGSWTGKNRVQNPYSHGNIV  
Manis Javanica: LKIGFLETCLKETPGTVLEVLCFFTLWSVVGLTGFHTFLVALNQTTNEDIKGSWTGKNRVQNPYSHGNIV

**TTXE**

Human: KNCCEVLCGLPLPPSVLDRRGILPLEESGSRPPSTQETSSSLLPQSPAPTEHLNSNEMPEDSSTPEEMPPP  
Rhinolophus Sinicus: KNCCEVLCGLPLPPSVLDRRGILPLEESGSRPPSTQETSSSLLPQSPALTEHLSTNKMPEDTSTPAKMPPP  
Pipistrellus Kuhlii: KNCCEVLCGLPLPPSVLDRRGILPLEESGSRPPSTQETSSSLLPQSPVSPVPDFKILRALTEHLSSNEMPED  
Camelus Dromedarius: KNCCEVLCGLPLPPSVLDRRGILPLEESGSRPPSTQETSSSLLPQSPVPTDHLSSSEMPEDTSTPEEMPPP  
Manis Javanica: KNCCEVLCGLPLPPSVLDRRGILPLEESGSRPPSTQETSSSLLPQNAPTEHLSSNEMPEDTSTPEEMPPP

|                     | 360                           | 370 |
|---------------------|-------------------------------|-----|
|                     | ..... ..... ..... ..... ..... |     |
| Human               | -----EPPEPPQEAAEAEK           |     |
| Rhinolophus Sinicus | -----EPPEPPQEVAEADK           |     |
| Pipistrellus Kuhlil | STPEEMPPEPPEPPQEVAEADK        |     |
| Camelus Dromedarius | -----EPPEPPQEGTEAEK           |     |
| Manis Javanica      | -----EPPEPPQEMTEAEK           |     |

Amino acid alignment of DHHC9 proteins from humans (homo sapiens), camel (camelus dromedaries, pangolin (manis javanica) and two bat species, Rhinolophus Sinicus (host of various  $\beta$ -CoVs including SARS-1 and presumably SARS-2) and Pipistrellus Kuhlil, host of MERS. The transmembrane regions and the amphiphilic helix following TMR4 are highlighted in grey. Cys and His residues that coordinate zinc ions, the DHHC motif and the TTEX motif are highlighted in light blue. Most of the C-terminal region is predicted to be unstructured (underlined). Amino acid differences to human DHHC9 are highlighted in yellow in the sequence of the respective species.

Accession numbers: DHHC9 sequences of Human (NP\_001008223.1), Rhinolophus Sinicus (XP\_019572571.1), Pipistrellus Kuhlil (XP\_036299136.1), Camelus Dromedarius (XP\_031301040.1) and Manis Javanica (XP\_036872770.1)

**Table S14: Amino acid differences between human DHHC20 and DHHC20 from animal hosts of  $\beta$ -CoVs**

|                     |                      |             |            |            |              |           |            |           |        |       |       |       |      |     |  |  |  |  |  |  |  |  |  |  |  |  |  |  |  |  |  |  |  |  |  |          |  |  |  |  |              |  |  |  |  |
|---------------------|----------------------|-------------|------------|------------|--------------|-----------|------------|-----------|--------|-------|-------|-------|------|-----|--|--|--|--|--|--|--|--|--|--|--|--|--|--|--|--|--|--|--|--|--|----------|--|--|--|--|--------------|--|--|--|--|
|                     | 10                   | 20          | 30         | 40         | 50           | 60        | 70         |           |        |       |       |       |      |     |  |  |  |  |  |  |  |  |  |  |  |  |  |  |  |  |  |  |  |  |  |          |  |  |  |  |              |  |  |  |  |
| Human               | MAPWTLWRCCQ          | RVVGVWPVLF  | ITFVVVWS   | YYAYVVELCV | FTIFGNEENGK  | TVVYLVAFH | LFFVMFVWSY |           |        |       |       |       |      |     |  |  |  |  |  |  |  |  |  |  |  |  |  |  |  |  |  |  |  |  |  |          |  |  |  |  |              |  |  |  |  |
| Rhinolophus Sinicus | MAPGRFWRCCQ          | RGVGVWPVLF  | IAFVVAWS   | YYAYVVELCV | FTLSGNGENGK  | AVVYLVTFH | LSFVMFVWSY |           |        |       |       |       |      |     |  |  |  |  |  |  |  |  |  |  |  |  |  |  |  |  |  |  |  |  |  |          |  |  |  |  |              |  |  |  |  |
| Pipistrellus Kuhlii | MAPGRFWRCC           | LRGAGVWPVLF | ITFVAAWS   | YYAYVVELC  | LFTLSGNGENGK | AVAYLVAFH | LFFVMFVWSY |           |        |       |       |       |      |     |  |  |  |  |  |  |  |  |  |  |  |  |  |  |  |  |  |  |  |  |  |          |  |  |  |  |              |  |  |  |  |
| Camelus Dromedarius | MAPGRFWRCCQ          | RGVGVWPVLF  | IAFVVAWS   | YYAYVVELCV | FTLSGNGENGK  | AVVYLVTFH | LSFVMFVWSY |           |        |       |       |       |      |     |  |  |  |  |  |  |  |  |  |  |  |  |  |  |  |  |  |  |  |  |  |          |  |  |  |  |              |  |  |  |  |
| Manis Javanica      | -----MFVWSY          |             |            |            |              |           |            |           |        |       |       |       |      |     |  |  |  |  |  |  |  |  |  |  |  |  |  |  |  |  |  |  |  |  |  |          |  |  |  |  |              |  |  |  |  |
|                     | TMR1                 |             |            |            |              |           |            |           |        |       |       |       |      |     |  |  |  |  |  |  |  |  |  |  |  |  |  |  |  |  |  |  |  |  |  | TMR2     |  |  |  |  |              |  |  |  |  |
|                     | 80                   | 90          | 100        | 110        | 120          | 130       | 140        |           |        |       |       |       |      |     |  |  |  |  |  |  |  |  |  |  |  |  |  |  |  |  |  |  |  |  |  |          |  |  |  |  |              |  |  |  |  |
| Human               | MTIFTSPASPS          | KEFYLSNSEK  | ERYEKEFS   | QERQQEIL   | RRAARAL      | PIYTTAS   | KTI        | RYCEK     | CQLIK  | PDRAH |       |       |      |     |  |  |  |  |  |  |  |  |  |  |  |  |  |  |  |  |  |  |  |  |  |          |  |  |  |  |              |  |  |  |  |
| Rhinolophus Sinicus | MTIFTTPASPS          | KEFYLSNSEK  | ERYEKEFS   | PERQQDIL   | RRTARDLP     | IYTTSGS   | RRTIYRC    | CER       | CQLIK  | PDRAH |       |       |      |     |  |  |  |  |  |  |  |  |  |  |  |  |  |  |  |  |  |  |  |  |  |          |  |  |  |  |              |  |  |  |  |
| Pipistrellus Kuhlii | MTIFTSPAT            | PSKEFYLSNSE | REHYEKEFS  | QERQQEIL   | RRTAKDL      | PIYTTSGS  | RRTIYRC    | CER       | CQLIK  | PDRAH |       |       |      |     |  |  |  |  |  |  |  |  |  |  |  |  |  |  |  |  |  |  |  |  |  |          |  |  |  |  |              |  |  |  |  |
| Camelus Dromedarius | MTIFTSPASPS          | KEFYLSNSEK  | ERYEKEFS   | PERQQDIL   | RRTARDLP     | IYTTSGS   | RRTIYRC    | CER       | CQLIK  | PDRAH |       |       |      |     |  |  |  |  |  |  |  |  |  |  |  |  |  |  |  |  |  |  |  |  |  |          |  |  |  |  |              |  |  |  |  |
| Manis Javanica      | MTIFS                | SHASPSKEFY  | LSNSEKEHYE | KEFSQERQQE | ILRRAARD     | LPIYTTAS  | RRTIYRC    | CER       | CQLIK  | PDRAH |       |       |      |     |  |  |  |  |  |  |  |  |  |  |  |  |  |  |  |  |  |  |  |  |  |          |  |  |  |  |              |  |  |  |  |
|                     | Cysteine-rich domain |             |            |            |              |           |            |           |        |       |       |       |      |     |  |  |  |  |  |  |  |  |  |  |  |  |  |  |  |  |  |  |  |  |  | Acyl-CoA |  |  |  |  | Zinc-binding |  |  |  |  |
|                     | 150                  | 160         | 170        | 180        | 190          | 200       | 210        |           |        |       |       |       |      |     |  |  |  |  |  |  |  |  |  |  |  |  |  |  |  |  |  |  |  |  |  |          |  |  |  |  |              |  |  |  |  |
| Human               | HCSACDS              | CILKMDHHC   | PPWVNN     | CVGFSNYK   | FLLFL        | LLYSLLY   | CLFVAAT    | VLEYFIK   | FWT    | ----- |       |       |      |     |  |  |  |  |  |  |  |  |  |  |  |  |  |  |  |  |  |  |  |  |  |          |  |  |  |  |              |  |  |  |  |
| Rhinolophus Sinicus | HCSACD               | ICILKMDHHC  | PPWVNN     | CVGFSNYK   | FLLFL        | LLYSLLY   | CLFVA      | TTVLQYFIK | FWT    | L     | CHRRK | STES  | C    | PCQ |  |  |  |  |  |  |  |  |  |  |  |  |  |  |  |  |  |  |  |  |  |          |  |  |  |  |              |  |  |  |  |
| Pipistrellus Kuhlii | HCSACD               | ICILKMDHHC  | PPWVNN     | CVGFSNYK   | FLLFL        | LLYSLLY   | CLFVA      | TTVLQYFIK | FWT    | L     | CHRRK | STES  | C    | PCQ |  |  |  |  |  |  |  |  |  |  |  |  |  |  |  |  |  |  |  |  |  |          |  |  |  |  |              |  |  |  |  |
| Camelus Dromedarius | HCSACD               | ICILKMDHHC  | PPWVNN     | CVGFSNYK   | FLLFL        | LLYSLLY   | CLFVA      | TTVLQYFIK | FWT    | L     | CHRRK | STES  | C    | PCQ |  |  |  |  |  |  |  |  |  |  |  |  |  |  |  |  |  |  |  |  |  |          |  |  |  |  |              |  |  |  |  |
| Manis Javanica      | HCSACD               | ICILKMDHHC  | PPWVNN     | CVGFSNYK   | FLLFL        | LLYSLLY   | CLFVAAT    | VLEYFIK   | FWT    | L     | CHRRK | STES  | C    | PCQ |  |  |  |  |  |  |  |  |  |  |  |  |  |  |  |  |  |  |  |  |  |          |  |  |  |  |              |  |  |  |  |
|                     | DHHC                 |             |            |            |              |           |            |           |        |       |       |       |      |     |  |  |  |  |  |  |  |  |  |  |  |  |  |  |  |  |  |  |  |  |  | TMR3     |  |  |  |  |              |  |  |  |  |
|                     | 220                  | 230         | 240        | 250        | 260          | 270       | 280        |           |        |       |       |       |      |     |  |  |  |  |  |  |  |  |  |  |  |  |  |  |  |  |  |  |  |  |  |          |  |  |  |  |              |  |  |  |  |
| Human               | NELTDTRAK            | FHVLFLFF    | VSA        | MFISVLSL   | FSYHCWL      | VGKNR     | TTIES      | SFRAPTFS  | YSGPD  | GN    | GFSLG | SKN   | WR   |     |  |  |  |  |  |  |  |  |  |  |  |  |  |  |  |  |  |  |  |  |  |          |  |  |  |  |              |  |  |  |  |
| Rhinolophus Sinicus | NELPD                | TRAKFHVL    | FLFFVS     | TMFFISVLS  | SLFSYHCWL    | VGKNR     | TTIES      | SFRAPTFS  | YSG    | QD    | GN    | GFSLG | YSKN | WR  |  |  |  |  |  |  |  |  |  |  |  |  |  |  |  |  |  |  |  |  |  |          |  |  |  |  |              |  |  |  |  |
| Pipistrellus Kuhlii | NELTD                | TRAKFHVL    | FLFFVS     | TMFFISVLS  | SLFSYHCWL    | VGKNR     | TTIES      | S         | APTFS  | YSGPD | GN    | GFSLG | YSKN | WR  |  |  |  |  |  |  |  |  |  |  |  |  |  |  |  |  |  |  |  |  |  |          |  |  |  |  |              |  |  |  |  |
| Camelus Dromedarius | NELPD                | TRAKFHVL    | FLFFVS     | TMFFISVLS  | SLFSYHCWL    | VGKNR     | TTIES      | SFRAPTFS  | YSG    | QD    | GN    | GFSLG | HSKN | WR  |  |  |  |  |  |  |  |  |  |  |  |  |  |  |  |  |  |  |  |  |  |          |  |  |  |  |              |  |  |  |  |
| Manis Javanica      | NELSD                | TRAKFH      | ILFLFFVS   | AMFFVSVLS  | SLFSYHCWL    | VG        | RNRTTIES   | SFRAPTFS  | YSGPD  | GN    | GFSLG | YSKN  | WR   |     |  |  |  |  |  |  |  |  |  |  |  |  |  |  |  |  |  |  |  |  |  |          |  |  |  |  |              |  |  |  |  |
|                     | TMR4                 |             |            |            |              |           |            |           |        |       |       |       |      |     |  |  |  |  |  |  |  |  |  |  |  |  |  |  |  |  |  |  |  |  |  | TTXE     |  |  |  |  |              |  |  |  |  |
|                     | 290                  | 300         | 310        | 320        | 330          | 340       | 350        |           |        |       |       |       |      |     |  |  |  |  |  |  |  |  |  |  |  |  |  |  |  |  |  |  |  |  |  |          |  |  |  |  |              |  |  |  |  |
| Human               | QVFGDEK              | KYWLLPI     | FSSSLG     | DCSFPT     | RLVGM        | DPEQASV   | TNQNEYAR   | SSGSNQ    | PFPIK  | PLSE  | SKN   | RLLD  | SE   |     |  |  |  |  |  |  |  |  |  |  |  |  |  |  |  |  |  |  |  |  |  |          |  |  |  |  |              |  |  |  |  |
| Rhinolophus Sinicus | QVFGDEK              | KYWLLPI     | FSSSLG     | DCSFPT     | RLVGM        | DPEQASV   | TNQNEYAR   | ISGN      | PPFP   | IR    | PLSE  | SKN   | RLLD | SE  |  |  |  |  |  |  |  |  |  |  |  |  |  |  |  |  |  |  |  |  |  |          |  |  |  |  |              |  |  |  |  |
| Pipistrellus Kuhlii | QVFGDEK              | KYWLLPI     | FSSSLG     | DCSFPT     | RLVGM        | DPEQASV   | TNQNEYAR   | ISGN      | QPPFIK | PLSE  | SKN   | RLLD  | S    | D   |  |  |  |  |  |  |  |  |  |  |  |  |  |  |  |  |  |  |  |  |  |          |  |  |  |  |              |  |  |  |  |
| Camelus Dromedarius | QVFGDEK              | KYWLLPI     | FSSSLG     | DCSFPT     | RLVGM        | DPEQASV   | TNQNEYAR   | ISGN      | PPFP   | VR    | PLSE  | SKN   | RLLD | SE  |  |  |  |  |  |  |  |  |  |  |  |  |  |  |  |  |  |  |  |  |  |          |  |  |  |  |              |  |  |  |  |
| Manis Javanica      | QVFGDEK              | KYWLLPI     | FSSSLG     | DCSF       | ARLVGT       | DPERASV   | TSQNE      | CARS      | ISSNQ  | PFPIK | PLSE  | SKN   | RLLD | SE  |  |  |  |  |  |  |  |  |  |  |  |  |  |  |  |  |  |  |  |  |  |          |  |  |  |  |              |  |  |  |  |

|                     | 360                                               | 370                 | 380 | 390 |
|---------------------|---------------------------------------------------|---------------------|-----|-----|
|                     | .... .... .... .... .... .... .... .... .... .... |                     |     |     |
| Human               | SQWLENGAEEGIVKSGTNNHVTVAIEN                       | -----               |     |     |
| Rhinolophus Sinicus | <b>CQWTENGSEEGTV</b> RSGTNNHVTVAIEN               | -----               |     |     |
| Pipistrellus Kuhlii | SQWTENGSEEDTIRSGINNFVTVAI                         | DKKVTCPLLLKKLDPEKSD |     |     |
| Camelus Dromedarius | <b>CQWTENGSEEGTV</b> RSGTNNHVTVAIQN               | -----               |     |     |
| Manis Javanica      | SHWIENGSEEGIVRSGTNNHVTVAIEN                       | -----               |     |     |

Amino acid alignment of DHHC20 proteins from humans (*homo sapiens*), camel (*camelus dromedaries*), pangolin (*manis javanica*) and two bat species, *Rhinolophus Sinicus* (host of various  $\beta$ -CoVs including SARS-1 and presumably SARS-2) and *Pipistrellus Kuhlii*, host of MERS. The transmembrane regions are highlighted in grey, individual residues that contact the acyl chain in the cavity are highlighted in green and the two (S and T) that seal the cavity are highlighted in pink. The amphiphilic helix following TMR4 is also highlighted in grey. Cys and His residues that coordinate zinc ions, the DHHC motif and the TTEX motif are highlighted in light blue and basic residues involved in acyl-CoA binding are highlighted in green. LVGM is the end of the resolved DHHC20 structure. Amino acid differences to human DHHC2 are highlighted in yellow in the sequence of the respective species and the non-conservative exchanges labeled in the 3D-structure of DHHC20 are in red.

Accession numbers: DHHC20 sequences of Human (NP\_001316988.1), Rhinolophus Sinicus (XP\_019571223.1), Pipistrellus Kuhlii (XP\_036313463.1), Camelus Dromedarius (XP\_031321583.1) and Manis Javanica (XP\_036857811.1).
